# Supplementary material for: Nucleolar Phosphoprotein NPM1 Interacts With Porcine Circovirus Type 3 Cap Protein and Facilitates Viral Replication
Source: Front Microbiol. 2021 May 25;12:679341. doi: 10.3389/fmicb.2021.679341 (PMC8185148; doi:10.3389/fmicb.2021.679341)
Supplement: Supplementary file 1 [file Table_1.xlsx]

## Sheet: 1
Accession	Description	ΣCoverage	Σ# Peptides	Σ# PSMs	Score K2	MW [kDa]
P06748	Nucleophosmin OS=Homo sapiens GN=NPM1 PE=1 SV=2 - [NPM_HUMAN]	25.17	10	14	203.273	32.5548
A0A140VJQ2	Testicular tissue protein Li 128 OS=Homo sapiens PE=2 SV=1 - [A0A140VJQ2_HUMAN]	26.25	9	13	201.224	28.3827
Q13092	Epidermal type I keratin (Fragment) OS=Homo sapiens GN=K14 PE=2 SV=1 - [Q13092_HUMAN]	17.83	4	15	67.4423	17.7206
A3R0T7	Liver histone H1e OS=Homo sapiens PE=2 SV=1 - [A3R0T7_HUMAN]	21.92	4	8	67.08	21.866
A0A024RAP1	C-type lectin domain family 2, member D, isoform CRA_b OS=Homo sapiens GN=CLEC2D PE=4 SV=1 - [A0A024RAP1_HUMAN]	20.18	7	7	62.5514	23.801
G5E9V5	28S ribosomal protein S22, mitochondrial OS=Homo sapiens GN=MRPS22 PE=1 SV=1 - [G5E9V5_HUMAN]	3.9	2	2	61.41	41.1834
A4D1Q5	Ribosomal protein L15 OS=Homo sapiens GN=LOC136321 PE=3 SV=1 - [A4D1Q5_HUMAN]	6.37	2	2	60.5729	23.7549
B4DRX3	60S ribosomal protein L6 OS=Homo sapiens PE=2 SV=1 - [B4DRX3_HUMAN]	13.66	4	4	58.1194	26.0569
Q14666	Radiated keratinocyte mRNA 266 (keratin-related protein) (Fragment) OS=Homo sapiens PE=2 SV=1 - [Q14666_HUMAN]	8.65	4	15	57.5786	30.8186
P46781	40S ribosomal protein S9 OS=Homo sapiens GN=RPS9 PE=1 SV=3 - [RS9_HUMAN]	26.29	7	7	55.7334	22.5776
P39023	60S ribosomal protein L3 OS=Homo sapiens GN=RPL3 PE=1 SV=2 - [RL3_HUMAN]	12.66	7	9	55.4116	46.0798
O43150	Arf-GAP with SH3 domain, ANK repeat and PH domain-containing protein 2 OS=Homo sapiens GN=ASAP2 PE=1 SV=3 - [ASAP2_HUMAN]	0.8	1	8	51.422	111.581
Q6IPX5	Ribosomal protein S2 OS=Homo sapiens GN=RPS2 PE=2 SV=1 - [Q6IPX5_HUMAN]	21.5	8	17	50.8377	31.2766
E9PM36	40S ribosomal protein S2 OS=Homo sapiens GN=RPS2 PE=1 SV=1 - [E9PM36_HUMAN]	22.97	6	14	50.8377	21.5994
Q9NY12	H/ACA ribonucleoprotein complex subunit 1 OS=Homo sapiens GN=GAR1 PE=1 SV=1 - [GAR1_HUMAN]	3.69	1	11	50.71	22.3342
Q53G49	Ribosomal protein L19 (Fragment) OS=Homo sapiens PE=2 SV=1 - [Q53G49_HUMAN]	10.71	3	3	49.4852	23.4522
P84098	60S ribosomal protein L19 OS=Homo sapiens GN=RPL19 PE=1 SV=1 - [RL19_HUMAN]	10.71	3	3	49.4852	23.4512
P52597	Heterogeneous nuclear ribonucleoprotein F OS=Homo sapiens GN=HNRNPF PE=1 SV=3 - [HNRPF_HUMAN]	5.54	3	6	49.3885	45.6429
Q6IPH7	RPL14 protein OS=Homo sapiens GN=RPL14 PE=1 SV=1 - [Q6IPH7_HUMAN]	8.18	2	2	48.5244	23.7722
E7EPB3	60S ribosomal protein L14 OS=Homo sapiens GN=RPL14 PE=1 SV=1 - [E7EPB3_HUMAN]	14.52	2	2	48.5244	14.5486
Q86V81	THO complex subunit 4 OS=Homo sapiens GN=ALYREF PE=1 SV=3 - [THOC4_HUMAN]	7	2	4	47.58	26.8716
Q96EY4	Translation machinery-associated protein 16 OS=Homo sapiens GN=TMA16 PE=1 SV=2 - [TMA16_HUMAN]	3.45	1	1	45.07	23.8494
P62906	60S ribosomal protein L10a OS=Homo sapiens GN=RPL10A PE=1 SV=2 - [RL10A_HUMAN]	7.37	2	2	44.84	24.8155
Q0VGL3	RPL13A protein OS=Homo sapiens GN=RPL13A PE=2 SV=1 - [Q0VGL3_HUMAN]	14.79	3	4	44.5551	16.7064
P40429	60S ribosomal protein L13a OS=Homo sapiens GN=RPL13A PE=1 SV=2 - [RL13A_HUMAN]	10.34	3	4	44.5551	23.5624
P10599	Thioredoxin OS=Homo sapiens GN=TXN PE=1 SV=3 - [THIO_HUMAN]	8.57	1	2	44.41	11.7297
K0A7K7	TNF receptor-associated protein 1 (Fragment) OS=Homo sapiens GN=TRAP1 PE=2 SV=1 - [K0A7K7_HUMAN]	0.74	1	6	43.82	76.8798
V9GYK6	Sodium bicarbonate transporter-like protein 11 OS=Homo sapiens GN=SLC4A11 PE=1 SV=1 - [V9GYK6_HUMAN]	0.87	1	6	43.82	63.449
Q9H999	Pantothenate kinase 3 OS=Homo sapiens GN=PANK3 PE=1 SV=1 - [PANK3_HUMAN]	1.35	1	6	43.82	41.0679
G3V2N3	Paired mesoderm homeobox protein 1 OS=Homo sapiens GN=PRRX1 PE=1 SV=1 - [G3V2N3_HUMAN]	2.5	1	6	43.82	22.5435
A0A0A0MSP0	Calcium-transporting ATPase OS=Homo sapiens GN=ATP2C2 PE=1 SV=1 - [A0A0A0MSP0_HUMAN]	0.51	1	6	43.82	106.148
Q9BYN8	28S ribosomal protein S26, mitochondrial OS=Homo sapiens GN=MRPS26 PE=1 SV=1 - [RT26_HUMAN]	3.41	1	1	43.39	24.1969
P46782	40S ribosomal protein S5 OS=Homo sapiens GN=RPS5 PE=1 SV=4 - [RS5_HUMAN]	11.76	4	4	42.7251	22.8621
P19338	Nucleolin OS=Homo sapiens GN=NCL PE=1 SV=3 - [NUCL_HUMAN]	0.99	1	1	42.68	76.5684
O14746	Telomerase reverse transcriptase OS=Homo sapiens GN=TERT PE=1 SV=1 - [TERT_HUMAN]	0.53	1	1	42.18	126.916
E7EX92	Crystallin beta-gamma domain-containing 2 OS=Homo sapiens GN=CRYBG2 PE=1 SV=1 - [E7EX92_HUMAN]	1.7	1	1	42.18	37.8432
Q6PKD2	HNRPCL1 protein (Fragment) OS=Homo sapiens GN=HNRPCL1 PE=2 SV=1 - [Q6PKD2_HUMAN]	4.35	1	1	41.34	22.6378
P07910	Heterogeneous nuclear ribonucleoproteins C1/C2 OS=Homo sapiens GN=HNRNPC PE=1 SV=4 - [HNRPC_HUMAN]	2.94	1	1	41.34	33.6495
P12036	Neurofilament heavy polypeptide OS=Homo sapiens GN=NEFH PE=1 SV=4 - [NFH_HUMAN]	0.78	1	10	40.34	112.411
Q59GK9	Ribosomal protein L21 variant (Fragment) OS=Homo sapiens PE=2 SV=1 - [Q59GK9_HUMAN]	3.68	1	1	40.15	18.8793
P46778	60S ribosomal protein L21 OS=Homo sapiens GN=RPL21 PE=1 SV=2 - [RL21_HUMAN]	3.75	1	1	40.15	18.5531
P05455	Lupus La protein OS=Homo sapiens GN=SSB PE=1 SV=2 - [LA_HUMAN]	8.33	4	4	39.2895	46.8082
B5BUB5	Autoantigen La (Fragment) OS=Homo sapiens GN=SSB PE=2 SV=1 - [B5BUB5_HUMAN]	8.33	4	4	39.2895	46.8382
P62917	60S ribosomal protein L8 OS=Homo sapiens GN=RPL8 PE=1 SV=2 - [RL8_HUMAN]	12.45	5	10	39.0176	28.0073
Q9BY07	Electrogenic sodium bicarbonate cotransporter 4 OS=Homo sapiens GN=SLC4A5 PE=2 SV=2 - [S4A5_HUMAN]	0.53	1	1	38.94	126.174
E7EQT3	Anion exchange protein OS=Homo sapiens GN=SLC4A5 PE=1 SV=9 - [E7EQT3_HUMAN]	0.6	1	1	38.94	109.696
Q9ULU4	Protein kinase C-binding protein 1 OS=Homo sapiens GN=ZMYND8 PE=1 SV=2 - [PKCB1_HUMAN]	0.51	1	2	38.77	131.61
Q9HBM1	Kinetochore protein Spc25 OS=Homo sapiens GN=SPC25 PE=1 SV=1 - [SPC25_HUMAN]	2.68	1	2	38.77	26.1365
H3BN50	Na(+)/H(+) exchange regulatory cofactor NHE-RF2 (Fragment) OS=Homo sapiens GN=SLC9A3R2 PE=1 SV=1 - [H3BN50_HUMAN]	3.14	1	1	38.45	24.3284
Q8N1G0	Zinc finger protein 687 OS=Homo sapiens GN=ZNF687 PE=1 SV=1 - [ZN687_HUMAN]	0.81	2	4	38.38	129.446
K7EKA5	Zinc finger protein 556 OS=Homo sapiens GN=ZNF556 PE=1 SV=1 - [K7EKA5_HUMAN]	7.25	1	3	38.38	8.13438
Q5T6V6	UPF0553 protein C9orf64 OS=Homo sapiens GN=C9orf64 PE=1 SV=1 - [Q5T6V6_HUMAN]	8.33	1	3	38.38	6.9385
A0A126LAV9	U14 OS=Homo sapiens GN=U14 PE=4 SV=1 - [A0A126LAV9_HUMAN]	0.82	1	3	38.38	69.4991
O75386	Tubby-related protein 3 OS=Homo sapiens GN=TULP3 PE=1 SV=2 - [TULP3_HUMAN]	1.13	1	3	38.38	49.6109
D3DU05	Tousled-like kinase 2, isoform CRA_a OS=Homo sapiens GN=TLK2 PE=4 SV=1 - [D3DU05_HUMAN]	1.33	2	5	38.38	85.3763
Q9H281	Serologically defined breast cancer antigen NY-BR-49 (Fragment) OS=Homo sapiens PE=2 SV=1 - [Q9H281_HUMAN]	1.42	1	3	38.38	37.8515
J3QLK5	Serine/threonine-protein kinase tousled-like 2 OS=Homo sapiens GN=TLK2 PE=1 SV=1 - [J3QLK5_HUMAN]	1.66	2	5	38.38	69.2442
B3KRP1	Serine/threonine-protein kinase tousled-like 1 OS=Homo sapiens GN=TLK1 PE=1 SV=1 - [B3KRP1_HUMAN]	1.21	1	3	38.38	45.7533
P57078	Receptor-interacting serine/threonine-protein kinase 4 OS=Homo sapiens GN=RIPK4 PE=1 SV=1 - [RIPK4_HUMAN]	0.6	1	3	38.38	91.5535
Q6FHK7	PSME3 protein OS=Homo sapiens GN=PSME3 PE=2 SV=1 - [Q6FHK7_HUMAN]	9.45	4	9	38.38	29.5606
Q9H7Z3	Protein NRDE2 homolog OS=Homo sapiens GN=NRDE2 PE=1 SV=3 - [NRDE2_HUMAN]	0.43	1	3	38.38	132.589
P05165	Propionyl-CoA carboxylase alpha chain, mitochondrial OS=Homo sapiens GN=PCCA PE=1 SV=4 - [PCCA_HUMAN]	0.69	1	3	38.38	80.0081
Q9UPJ7	PkB-like (Fragment) OS=Homo sapiens GN=PkB-like 2 PE=4 SV=1 - [Q9UPJ7_HUMAN]	1.57	1	3	38.38	36.5973
Q9HD40	O-phosphoseryl-tRNA(Sec) selenium transferase OS=Homo sapiens GN=SEPSECS PE=1 SV=2 - [SPCS_HUMAN]	1	1	3	38.38	55.6905
Q9UKX7	Nuclear pore complex protein Nup50 OS=Homo sapiens GN=NUP50 PE=1 SV=2 - [NUP50_HUMAN]	11.97	7	10	38.38	50.1132
E9PL24	Myomegalin OS=Homo sapiens GN=PDE4DIP PE=1 SV=2 - [E9PL24_HUMAN]	0.45	1	3	38.38	126.871
Q8N4P6	Leucine-rich repeat-containing protein 71 OS=Homo sapiens GN=LRRC71 PE=2 SV=1 - [LRC71_HUMAN]	1.79	2	4	38.38	61.7866
O00522	Krev interaction trapped protein 1 OS=Homo sapiens GN=KRIT1 PE=1 SV=2 - [KRIT1_HUMAN]	0.68	1	3	38.38	84.2944
Q14789	Golgin subfamily B member 1 OS=Homo sapiens GN=GOLGB1 PE=1 SV=2 - [GOGB1_HUMAN]	0.52	3	8	38.38	375.79
Q9UKJ3	G patch domain-containing protein 8 OS=Homo sapiens GN=GPATCH8 PE=1 SV=2 - [GPTC8_HUMAN]	0.33	1	3	38.38	164.098
O43592	Exportin-T OS=Homo sapiens GN=XPOT PE=1 SV=2 - [XPOT_HUMAN]	0.52	1	3	38.38	109.893
Q8WXX0	Dynein heavy chain 7, axonemal OS=Homo sapiens GN=DNAH7 PE=1 SV=2 - [DYH7_HUMAN]	0.25	2	4	38.38	460.862
A0A0J9YY17	Dynein heavy chain 10, axonemal (Fragment) OS=Homo sapiens GN=DNAH10 PE=1 SV=1 - [A0A0J9YY17_HUMAN]	0.16	1	3	38.38	366.273
H0YI06	Developmentally-regulated GTP-binding protein 1 (Fragment) OS=Homo sapiens GN=DRG1 PE=1 SV=1 - [H0YI06_HUMAN]	8.93	2	8	38.38	6.76961
Q5VT06	Centrosome-associated protein 350 OS=Homo sapiens GN=CEP350 PE=1 SV=1 - [CE350_HUMAN]	0.16	1	3	38.38	350.716
A0A024R914	Centrosomal protein 350kDa, isoform CRA_a OS=Homo sapiens GN=CEP350 PE=4 SV=1 - [A0A024R914_HUMAN]	0.16	1	3	38.38	350.715
Q8TC20	Cancer-associated gene 1 protein OS=Homo sapiens GN=CAGE1 PE=1 SV=2 - [CAGE1_HUMAN]	0.64	1	3	38.38	90.1932
A5PKX5	Alpha-mannosidase OS=Homo sapiens GN=MAN2A1 PE=2 SV=1 - [A5PKX5_HUMAN]	0.87	2	4	38.38	130.954
P24298	Alanine aminotransferase 1 OS=Homo sapiens GN=GPT PE=1 SV=3 - [ALAT1_HUMAN]	2.02	2	5	38.38	54.6022
Q5TCS8	Adenylate kinase 9 OS=Homo sapiens GN=AK9 PE=1 SV=2 - [KAD9_HUMAN]	0.26	1	3	38.38	221.273
O15530	3-phosphoinositide-dependent protein kinase 1 OS=Homo sapiens GN=PDPK1 PE=1 SV=1 - [PDPK1_HUMAN]	0.9	1	3	38.38	63.112
Q01970	1-phosphatidylinositol 4,5-bisphosphate phosphodiesterase beta-3 OS=Homo sapiens GN=PLCB3 PE=1 SV=2 - [PLCB3_HUMAN]	0.41	1	3	38.38	138.713
J3QT09	Sentrin-specific protease 7 OS=Homo sapiens GN=SENP7 PE=1 SV=1 - [J3QT09_HUMAN]	0.61	1	1	38.03	112.41
Q9Y217	Myotubularin-related protein 6 OS=Homo sapiens GN=MTMR6 PE=1 SV=3 - [MTMR6_HUMAN]	0.97	1	1	38.03	71.9222
Q8N183	Mimitin, mitochondrial OS=Homo sapiens GN=NDUFAF2 PE=1 SV=1 - [MIMIT_HUMAN]	3.55	1	1	38.03	19.8441
A0A126LAY7	U40 OS=Homo sapiens GN=U40 PE=3 SV=1 - [A0A126LAY7_HUMAN]	0.69	1	6	37.79	82.7871
Q9BZ23	Pantothenate kinase 2, mitochondrial OS=Homo sapiens GN=PANK2 PE=1 SV=3 - [PANK2_HUMAN]	0.88	1	6	37.79	62.6412
Q8TE04	Pantothenate kinase 1 OS=Homo sapiens GN=PANK1 PE=1 SV=2 - [PANK1_HUMAN]	0.84	1	6	37.79	64.2982
O75185	Calcium-transporting ATPase type 2C member 2 OS=Homo sapiens GN=ATP2C2 PE=1 SV=2 - [AT2C2_HUMAN]	0.53	1	6	37.79	103.121
B0YJC4	Vimentin OS=Homo sapiens GN=VIM PE=1 SV=1 - [B0YJC4_HUMAN]	5.34	3	13	37.71	49.6231
Q8IWY7	Tau-tubulin kinase OS=Homo sapiens GN=TTBK2 PE=1 SV=1 - [Q8IWY7_HUMAN]	0.79	2	11	37.71	182.353
P20800	Endothelin-2 OS=Homo sapiens GN=EDN2 PE=1 SV=2 - [EDN2_HUMAN]	2.81	1	6	37.4	19.9472
Q6UXY1	Brain-specific angiogenesis inhibitor 1-associated protein 2-like protein 2 OS=Homo sapiens GN=BAIAP2L2 PE=1 SV=1 - [BI2L2_HUMAN]	0.95	1	6	37.4	58.9496
Q00722	1-phosphatidylinositol 4,5-bisphosphate phosphodiesterase beta-2 OS=Homo sapiens GN=PLCB2 PE=1 SV=2 - [PLCB2_HUMAN]	0.42	1	6	37.4	133.939
O76041	Nebulette OS=Homo sapiens GN=NEBL PE=1 SV=1 - [NEBL_HUMAN]	1.58	1	1	37.01	116.381
A0A024R866	Ribosomal protein L35, isoform CRA_a OS=Homo sapiens GN=RPL35 PE=3 SV=1 - [A0A024R866_HUMAN]	3.55	1	1	36.44	17.7626
B7ZMI3	ITPR1 protein OS=Homo sapiens GN=ITPR1 PE=1 SV=1 - [B7ZMI3_HUMAN]	1.8	2	2	36.44	81.8955
Q14573	Inositol 1,4,5-trisphosphate receptor type 3 OS=Homo sapiens GN=ITPR3 PE=1 SV=2 - [ITPR3_HUMAN]	0.49	2	2	36.44	303.912
Q14571	Inositol 1,4,5-trisphosphate receptor type 2 OS=Homo sapiens GN=ITPR2 PE=1 SV=2 - [ITPR2_HUMAN]	0.67	3	3	36.44	307.867
Q14643	Inositol 1,4,5-trisphosphate receptor type 1 OS=Homo sapiens GN=ITPR1 PE=1 SV=3 - [ITPR1_HUMAN]	0.47	2	2	36.44	313.729
Q08378	Golgin subfamily A member 3 OS=Homo sapiens GN=GOLGA3 PE=1 SV=2 - [GOGA3_HUMAN]	1.34	3	10	35.98	167.252
H7BZK1	Sorbin and SH3 domain-containing protein 2 (Fragment) OS=Homo sapiens GN=SORBS2 PE=1 SV=1 - [H7BZK1_HUMAN]	2.41	1	2	35.48	32.5262
A0A1W2PS94	Testis-expressed protein 15 OS=Homo sapiens GN=TEX15 PE=1 SV=1 - [A0A1W2PS94_HUMAN]	0.16	1	1	35.35	359.011
H3BQQ2	E3 ubiquitin-protein ligase ZNF598 OS=Homo sapiens GN=ZNF598 PE=1 SV=1 - [H3BQQ2_HUMAN]	0.71	1	2	35.24	93.2297
P15924	Desmoplakin OS=Homo sapiens GN=DSP PE=1 SV=3 - [DESP_HUMAN]	1.39	6	9	35.14	331.569
O75152	Zinc finger CCCH domain-containing protein 11A OS=Homo sapiens GN=ZC3H11A PE=1 SV=3 - [ZC11A_HUMAN]	0.74	1	7	35.1	89.076
A0A140VK82	Testis secretory sperm-binding protein Li 209a OS=Homo sapiens PE=2 SV=1 - [A0A140VK82_HUMAN]	0.84	1	1	35.1	63.2278
Q9NY72	Sodium channel subunit beta-3 OS=Homo sapiens GN=SCN3B PE=1 SV=1 - [SCN3B_HUMAN]	2.33	1	1	35.1	24.6863
Q9UI33	Sodium channel protein type 11 subunit alpha OS=Homo sapiens GN=SCN11A PE=1 SV=2 - [SCNBA_HUMAN]	0.28	1	1	35.1	204.788
A6NKG5	Retrotransposon-like protein 1 OS=Homo sapiens GN=RTL1 PE=3 SV=3 - [RTL1_HUMAN]	0.37	1	1	35.1	154.95
Q8IYT1	Protein FAM71A OS=Homo sapiens GN=FAM71A PE=2 SV=2 - [FA71A_HUMAN]	0.84	1	1	35.1	63.1378
Q86UT6	NLR family member X1 OS=Homo sapiens GN=NLRX1 PE=1 SV=1 - [NLRX1_HUMAN]	0.51	1	1	35.1	107.548
O95822	Malonyl-CoA decarboxylase, mitochondrial OS=Homo sapiens GN=MLYCD PE=1 SV=3 - [DCMC_HUMAN]	1.01	1	1	35.1	54.9688
Q9UQ16	Dynamin-3 OS=Homo sapiens GN=DNM3 PE=1 SV=4 - [DYN3_HUMAN]	0.58	1	1	35.1	97.685
P50570	Dynamin-2 OS=Homo sapiens GN=DNM2 PE=1 SV=2 - [DYN2_HUMAN]	0.57	1	1	35.1	98.0032
Q05193	Dynamin-1 OS=Homo sapiens GN=DNM1 PE=1 SV=2 - [DYN1_HUMAN]	0.58	1	1	35.1	97.347
Q13098	COP9 signalosome complex subunit 1 OS=Homo sapiens GN=GPS1 PE=1 SV=4 - [CSN1_HUMAN]	1.22	1	7	35.1	55.5012
B8X6N1	Beta3 adrenoceptor OS=Homo sapiens GN=ADRB3 PE=2 SV=1 - [B8X6N1_HUMAN]	1.23	1	1	35.1	43.5138
H3BQ65	Alpha-1,6-mannosylglycoprotein 6-beta-N-acetylglucosaminyltransferase B OS=Homo sapiens GN=MGAT5B PE=1 SV=1 - [H3BQ65_HUMAN]	1.04	1	1	35.1	54.513
O75618	Death effector domain-containing protein OS=Homo sapiens GN=DEDD PE=1 SV=1 - [DEDD_HUMAN]	1.57	1	1	34.83	36.7712
Q9NWB6	Arginine and glutamate-rich protein 1 OS=Homo sapiens GN=ARGLU1 PE=1 SV=1 - [ARGL1_HUMAN]	5.86	2	3	34.58	33.1968
Q96DV6	40S ribosomal protein S6 OS=Homo sapiens GN=RPS6 PE=2 SV=1 - [Q96DV6_HUMAN]	9.24	3	7	34.26	28.691
E5RHC1	Serine/threonine-protein phosphatase (Fragment) OS=Homo sapiens GN=PPP2CB PE=1 SV=1 - [E5RHC1_HUMAN]	3.26	1	2	34.0854	21.0324
X6RJ73	39S ribosomal protein L24, mitochondrial (Fragment) OS=Homo sapiens GN=MRPL24 PE=1 SV=1 - [X6RJ73_HUMAN]	4.05	1	2	34.0854	19.7494
B2RU25	Stromal antigen 3 OS=Homo sapiens GN=STAG3 PE=2 SV=1 - [B2RU25_HUMAN]	1.14	2	5	33.91	138.976
Q9BY74	Ribosomal protein L7a (Fragment) OS=Homo sapiens GN=RP-L7a PE=2 SV=1 - [Q9BY74_HUMAN]	8.45	2	6	33.84	15.6267
Q5T8U2	60S ribosomal protein L7a OS=Homo sapiens GN=RPL7A PE=1 SV=1 - [Q5T8U2_HUMAN]	7.95	2	6	33.84	16.5291
Q5QPU8	Protein SYS1 homolog (Fragment) OS=Homo sapiens GN=SYS1 PE=4 SV=1 - [Q5QPU8_HUMAN]	5.08	1	2	33.62	13.3328
G3V599	Melanoma inhibitory activity protein 2 OS=Homo sapiens GN=MIA2 PE=4 SV=1 - [G3V599_HUMAN]	0.6	1	1	33.53	151.626
P61313	60S ribosomal protein L15 OS=Homo sapiens GN=RPL15 PE=1 SV=2 - [RL15_HUMAN]	6.37	2	2	33.41	24.1311
P27635	60S ribosomal protein L10 OS=Homo sapiens GN=RPL10 PE=1 SV=4 - [RL10_HUMAN]	9.35	3	3	33.28	24.5879
P09012	U1 small nuclear ribonucleoprotein A OS=Homo sapiens GN=SNRPA PE=1 SV=3 - [SNRPA_HUMAN]	2.84	1	2	33.09	31.2592
O43795	Unconventional myosin-Ib OS=Homo sapiens GN=MYO1B PE=1 SV=3 - [MYO1B_HUMAN]	0.44	1	3	32.85	131.902
Q6ZU65	Ubinuclein-2 OS=Homo sapiens GN=UBN2 PE=1 SV=2 - [UBN2_HUMAN]	0.37	1	3	32.85	145.998
Q96JG6	Syndetin OS=Homo sapiens GN=VPS50 PE=1 SV=3 - [VPS50_HUMAN]	0.52	1	3	32.85	111.104
O75683	Surfeit locus protein 6 OS=Homo sapiens GN=SURF6 PE=1 SV=3 - [SURF6_HUMAN]	3.32	2	4	32.85	41.4256
Q8WXA9	Splicing regulatory glutamine/lysine-rich protein 1 OS=Homo sapiens GN=SREK1 PE=1 SV=1 - [SREK1_HUMAN]	0.98	1	3	32.85	59.345
Q15393	Splicing factor 3B subunit 3 OS=Homo sapiens GN=SF3B3 PE=1 SV=4 - [SF3B3_HUMAN]	0.41	1	3	32.85	135.492
S4R3C4	Serine/arginine-rich-splicing factor 11 OS=Homo sapiens GN=SRSF11 PE=1 SV=1 - [S4R3C4_HUMAN]	6.25	1	3	32.85	7.95288
P49908	Selenoprotein P OS=Homo sapiens GN=SELENOP PE=1 SV=3 - [SEPP1_HUMAN]	1.31	1	3	32.85	43.1563
A0A024RB02	PTPRF interacting protein, binding protein 1 (Liprin beta 1), isoform CRA_a OS=Homo sapiens GN=PPFIBP1 PE=4 SV=1 - [A0A024RB02_HUMAN]	0.58	1	3	32.85	96.9042
H0YDM6	Protein kinase C and casein kinase substrate in neurons protein 3 (Fragment) OS=Homo sapiens GN=PACSIN3 PE=1 SV=1 - [H0YDM6_HUMAN]	6.58	2	8	32.85	8.33892
Q9NSV4	Protein diaphanous homolog 3 OS=Homo sapiens GN=DIAPH3 PE=1 SV=4 - [DIAP3_HUMAN]	0.42	1	3	32.85	136.839
O43157	Plexin-B1 OS=Homo sapiens GN=PLXNB1 PE=1 SV=3 - [PLXB1_HUMAN]	0.23	1	3	32.85	232.151
D3DR32	M-phase phosphoprotein 1, isoform CRA_a OS=Homo sapiens GN=MPHOSPH1 PE=3 SV=1 - [D3DR32_HUMAN]	0.28	1	3	32.85	206.034
Q9Y2U5	Mitogen-activated protein kinase kinase kinase 2 OS=Homo sapiens GN=MAP3K2 PE=1 SV=2 - [M3K2_HUMAN]	0.81	1	3	32.85	69.6972
Q86W92	Liprin-beta-1 OS=Homo sapiens GN=PPFIBP1 PE=1 SV=2 - [LIPB1_HUMAN]	0.49	1	3	32.85	113.952
B7ZL50	KLB protein OS=Homo sapiens GN=KLB PE=2 SV=1 - [B7ZL50_HUMAN]	0.48	1	3	32.85	118.822
P20591	Interferon-induced GTP-binding protein Mx1 OS=Homo sapiens GN=MX1 PE=1 SV=4 - [MX1_HUMAN]	2.11	2	4	32.85	75.4732
F8W9S7	GTPase-activating protein and VPS9 domain-containing protein 1 OS=Homo sapiens GN=GAPVD1 PE=1 SV=1 - [F8W9S7_HUMAN]	0.35	1	3	32.85	157.365
Q12860	Contactin-1 OS=Homo sapiens GN=CNTN1 PE=1 SV=1 - [CNTN1_HUMAN]	0.49	1	3	32.85	113.249
Q96N23	Cilia- and flagella-associated protein 54 OS=Homo sapiens GN=CFAP54 PE=2 SV=3 - [CFA54_HUMAN]	0.32	1	3	32.85	351.744
Q9UPV0	Centrosomal protein of 164 kDa OS=Homo sapiens GN=CEP164 PE=1 SV=3 - [CE164_HUMAN]	0.34	1	3	32.85	164.214
A7MD03	CCDC132 protein OS=Homo sapiens GN=CCDC132 PE=2 SV=1 - [A7MD03_HUMAN]	0.52	1	3	32.85	110.275
Q86Z14	Beta-klotho OS=Homo sapiens GN=KLB PE=1 SV=1 - [KLOTB_HUMAN]	0.48	1	3	32.85	119.732
Q9BSW5	RPS2 protein (Fragment) OS=Homo sapiens GN=RPS2 PE=2 SV=2 - [Q9BSW5_HUMAN]	26.8	3	5	32.46	10.5344
Q9P253	Vacuolar protein sorting-associated protein 18 homolog OS=Homo sapiens GN=VPS18 PE=1 SV=2 - [VPS18_HUMAN]	0.51	1	2	32.12	110.116
A0A126LAX7	U26 OS=Homo sapiens GN=U26 PE=4 SV=1 - [A0A126LAX7_HUMAN]	1.69	1	1	32.12	33.2957
Q96T67	TOB3 OS=Homo sapiens PE=2 SV=1 - [Q96T67_HUMAN]	7.44	6	7	32.12	65.0747
Q7RTM4	Spectrin-like protein of the nuclear envelope and Golgi OS=Homo sapiens GN=SYNE1 PE=2 SV=1 - [Q7RTM4_HUMAN]	0.13	2	2	32.12	965.738
E9PP43	Sortilin-related receptor OS=Homo sapiens GN=SORL1 PE=1 SV=1 - [E9PP43_HUMAN]	0.44	1	1	32.12	125.721
J3KQ66	Reelin OS=Homo sapiens GN=RELN PE=1 SV=1 - [J3KQ66_HUMAN]	0.14	1	1	32.12	388.185
Q5TEA6	Protein sel-1 homolog 2 OS=Homo sapiens GN=SEL1L2 PE=2 SV=2 - [SE1L2_HUMAN]	1.45	2	2	32.12	77.9142
Q15031	Probable leucine--tRNA ligase, mitochondrial OS=Homo sapiens GN=LARS2 PE=1 SV=2 - [SYLM_HUMAN]	0.55	1	2	32.12	101.911
Q504Q3	PAB-dependent poly(A)-specific ribonuclease subunit PAN2 OS=Homo sapiens GN=PAN2 PE=1 SV=3 - [PAN2_HUMAN]	0.42	1	1	32.12	135.281
Q7RTZ1	Ovochymase-2 OS=Homo sapiens GN=OVCH2 PE=3 SV=2 - [OVCH2_HUMAN]	0.89	1	1	32.12	62.6017
Q8NF91	Nesprin-1 OS=Homo sapiens GN=SYNE1 PE=1 SV=4 - [SYNE1_HUMAN]	0.13	2	2	32.12	1010.46
Q9NRE7	KIAA0220-like protein OS=Homo sapiens PE=2 SV=1 - [Q9NRE7_HUMAN]	3.27	1	1	32.12	16.6413
Q6ZR08	Dynein heavy chain 12, axonemal OS=Homo sapiens GN=DNAH12 PE=2 SV=2 - [DYH12_HUMAN]	0.26	1	2	31.18	356.713
Q9P035	Very-long-chain (3R)-3-hydroxyacyl-CoA dehydratase 3 OS=Homo sapiens GN=HACD3 PE=1 SV=2 - [HACD3_HUMAN]	1.38	1	1	31.08	43.1316
P18074	TFIIH basal transcription factor complex helicase XPD subunit OS=Homo sapiens GN=ERCC2 PE=1 SV=1 - [ERCC2_HUMAN]	0.66	1	1	31.08	86.8541
A8K8P3	Protein SFI1 homolog OS=Homo sapiens GN=SFI1 PE=1 SV=2 - [SFI1_HUMAN]	0.4	1	1	31.08	147.571
Q2TB79	ERCC2 protein OS=Homo sapiens GN=ERCC2 PE=2 SV=1 - [Q2TB79_HUMAN]	0.73	1	1	31.08	77.8716
Q8NG57	Elongin-A3 OS=Homo sapiens GN=ELOA3 PE=1 SV=2 - [ELOA3_HUMAN]	0.92	1	1	31.08	59.7074
Q5T749	Keratinocyte proline-rich protein OS=Homo sapiens GN=KPRP PE=1 SV=1 - [KPRP_HUMAN]	1.38	1	4	31.06	64.0932
Q86V15	Zinc finger protein castor homolog 1 OS=Homo sapiens GN=CASZ1 PE=1 SV=4 - [CASZ1_HUMAN]	0.63	2	9	31.05	189.948
Q96QZ7	Membrane-associated guanylate kinase, WW and PDZ domain-containing protein 1 OS=Homo sapiens GN=MAGI1 PE=1 SV=3 - [MAGI1_HUMAN]	0.4	1	5	30.86	164.481
V9P4H4	Magi1d OS=Homo sapiens PE=2 SV=1 - [V9P4H4_HUMAN]	0.46	1	5	30.86	144.611
Q8N2I2	Zinc finger protein 619 OS=Homo sapiens GN=ZNF619 PE=2 SV=1 - [ZN619_HUMAN]	0.89	1	2	30.84	63.281
Q9NXH8	Torsin-4A OS=Homo sapiens GN=TOR4A PE=1 SV=2 - [TOR4A_HUMAN]	1.18	1	2	30.84	46.8849
Q9ULW0	Targeting protein for Xklp2 OS=Homo sapiens GN=TPX2 PE=1 SV=2 - [TPX2_HUMAN]	2.01	2	3	30.84	85.6
Q9BYB0	SH3 and multiple ankyrin repeat domains protein 3 OS=Homo sapiens GN=SHANK3 PE=1 SV=3 - [SHAN3_HUMAN]	0.29	1	2	30.84	184.555
Q4G0G5	Secretoglobin family 2B member 2 OS=Homo sapiens GN=SCGB2B2 PE=3 SV=1 - [SC2B2_HUMAN]	5.21	1	2	30.84	10.5564
O15085	Rho guanine nucleotide exchange factor 11 OS=Homo sapiens GN=ARHGEF11 PE=1 SV=1 - [ARHGB_HUMAN]	0.33	1	2	30.84	167.601
K7ES28	Protein strawberry notch homolog 2 OS=Homo sapiens GN=SBNO2 PE=1 SV=1 - [K7ES28_HUMAN]	0.81	2	6	30.84	148.994
Q5ISC7	Predicted NUP98/PRRX2 fusion protein (Fragment) OS=Homo sapiens PE=2 SV=1 - [Q5ISC7_HUMAN]	1.87	1	2	30.84	28.0972
Q9BYU1	Pre-B-cell leukemia transcription factor 4 OS=Homo sapiens GN=PBX4 PE=1 SV=2 - [PBX4_HUMAN]	1.34	1	2	30.84	40.8285
Q9Y2H5	Pleckstrin homology domain-containing family A member 6 OS=Homo sapiens GN=PLEKHA6 PE=1 SV=4 - [PKHA6_HUMAN]	0.48	1	2	30.84	117.056
Q99811	Paired mesoderm homeobox protein 2 OS=Homo sapiens GN=PRRX2 PE=2 SV=2 - [PRRX2_HUMAN]	1.98	1	2	30.84	27.0628
Q9HCD5	Nuclear receptor coactivator 5 OS=Homo sapiens GN=NCOA5 PE=1 SV=2 - [NCOA5_HUMAN]	0.86	1	2	30.84	65.4965
Q9UKX3	Myosin-13 OS=Homo sapiens GN=MYH13 PE=2 SV=2 - [MYH13_HUMAN]	0.26	1	2	30.84	223.465
Q14333	Facioscapulohumeral muscular dystrophy OS=Homo sapiens GN=FSHD PE=4 SV=1 - [Q14333_HUMAN]	0.59	1	2	30.84	88.9735
C3U395	DUX4 OS=Homo sapiens GN=DUX4 PE=4 SV=1 - [C3U395_HUMAN]	0.73	1	2	30.84	72.3552
Q96PT3	Double homeobox protein 5 OS=Homo sapiens GN=DUX5 PE=2 SV=1 - [DUX5_HUMAN]	2.54	1	2	30.84	22.1505
Q9UBX2	Double homeobox protein 4 OS=Homo sapiens GN=DUX4 PE=1 SV=2 - [DUX4_HUMAN]	1.18	1	2	30.84	44.9128
O43812	Double homeobox protein 1 OS=Homo sapiens GN=DUX1 PE=1 SV=1 - [DUX1_HUMAN]	2.94	1	2	30.84	19.3351
A6H8X9	Centrosomal protein 170kDa OS=Homo sapiens GN=CEP170 PE=2 SV=1 - [A6H8X9_HUMAN]	0.34	1	2	30.84	161.34
Q86SE8	Nucleophosmin2 OS=Homo sapiens GN=NPM2 PE=1 SV=2 - [NPM2_HUMAN]	23.32	1	2	30.52	24.1
A0A075B7B7	GAS2-like protein 2 OS=Homo sapiens GN=GAS2L2 PE=1 SV=1 - [A0A075B7B7_HUMAN]	0.69	1	3	30.2	94.7857
O94763	Unconventional prefoldin RPB5 interactor 1 OS=Homo sapiens GN=URI1 PE=1 SV=3 - [RMP_HUMAN]	1.12	1	4	30.16	59.7956
B3KMJ9	Phosphodiesterase OS=Homo sapiens PE=2 SV=1 - [B3KMJ9_HUMAN]	1.35	1	4	30.16	50.252
O95263	High affinity cAMP-specific and IBMX-insensitive 3',5'-cyclic phosphodiesterase 8B OS=Homo sapiens GN=PDE8B PE=1 SV=2 - [PDE8B_HUMAN]	0.68	1	4	30.16	98.9162
A6H8K8	GRIK4 protein OS=Homo sapiens GN=GRIK4 PE=2 SV=1 - [A6H8K8_HUMAN]	0.78	1	1	30.08	85.6633
Q16099	Glutamate receptor ionotropic, kainate 4 OS=Homo sapiens GN=GRIK4 PE=2 SV=2 - [GRIK4_HUMAN]	0.63	1	1	30.08	107.176
B5MCP9	40S ribosomal protein S7 OS=Homo sapiens GN=RPS7 PE=1 SV=1 - [B5MCP9_HUMAN]	11.76	4	4	29.88	21.2988
Q147W7	KRT1B protein OS=Homo sapiens GN=KRT1B PE=2 SV=1 - [Q147W7_HUMAN]	3.77	3	10	29.85	37.4996
P20963	T-cell surface glycoprotein CD3 zeta chain OS=Homo sapiens GN=CD247 PE=1 SV=2 - [CD3Z_HUMAN]	3.05	1	1	29.52	18.6847
B2LYR2	CD247 transcript variant 2 (Fragment) OS=Homo sapiens GN=CD247 PE=2 SV=1 - [B2LYR2_HUMAN]	5	1	1	29.52	11.4988
Q6NSF2	RPLP0 protein OS=Homo sapiens GN=RPLP0 PE=2 SV=1 - [Q6NSF2_HUMAN]	6.3	2	2	29.51	27.2813
Q9C0A0	Contactin-associated protein-like 4 OS=Homo sapiens GN=CNTNAP4 PE=1 SV=3 - [CNTP4_HUMAN]	0.54	1	1	29.49	145.182
Q8WX98	Cell recognition protein CASPR4 OS=Homo sapiens GN=CASPR4 PE=2 SV=1 - [Q8WX98_HUMAN]	0.53	1	1	29.49	145.568
H0UI63	Zinc finger, NFX1-type containing 1, isoform CRA_b OS=Homo sapiens GN=ZNFX1 PE=4 SV=1 - [H0UI63_HUMAN]	0.26	1	1	29.44	220.105
P48553	Trafficking protein particle complex subunit 10 OS=Homo sapiens GN=TRAPPC10 PE=1 SV=2 - [TPC10_HUMAN]	0.4	1	1	29.44	142.098
Q8WW24	Tektin-4 OS=Homo sapiens GN=TEKT4 PE=1 SV=1 - [TEKT4_HUMAN]	1.15	1	1	29.44	50.6172
Q9H6N6	Putative uncharacterized protein MYH16 OS=Homo sapiens GN=MYH16 PE=1 SV=2 - [MYH16_HUMAN]	0.91	2	4	29.44	128.211
Q95460	Major histocompatibility complex class I-related gene protein OS=Homo sapiens GN=MR1 PE=1 SV=1 - [HMR1_HUMAN]	2.93	2	3	29.44	39.3408
Q9BW83	Intraflagellar transport protein 27 homolog OS=Homo sapiens GN=IFT27 PE=1 SV=1 - [IFT27_HUMAN]	3.23	1	1	29.44	20.4673
P30499	HLA class I histocompatibility antigen, Cw-1 alpha chain OS=Homo sapiens GN=HLA-C PE=1 SV=1 - [1C01_HUMAN]	1.37	1	1	29.44	40.939
Q1KMD3	Heterogeneous nuclear ribonucleoprotein U-like protein 2 OS=Homo sapiens GN=HNRNPUL2 PE=1 SV=1 - [HNRL2_HUMAN]	0.67	1	1	29.44	85.0522
P25092	Heat-stable enterotoxin receptor OS=Homo sapiens GN=GUCY2C PE=1 SV=2 - [GUC2C_HUMAN]	0.47	1	1	29.44	123.324
Q5JYG3	GPN-loop GTPase 2 OS=Homo sapiens GN=GPN2 PE=1 SV=1 - [Q5JYG3_HUMAN]	3.82	1	1	29.44	14.9814
M0R050	Exosome complex component RRP46 OS=Homo sapiens GN=EXOSC5 PE=1 SV=1 - [M0R050_HUMAN]	2.54	1	1	29.44	21.2426
Q9ULG1	DNA helicase INO80 OS=Homo sapiens GN=INO80 PE=1 SV=2 - [INO80_HUMAN]	0.32	1	1	29.44	176.643
P17858	ATP-dependent 6-phosphofructokinase, liver type OS=Homo sapiens GN=PFKL PE=1 SV=6 - [PFKAL_HUMAN]	0.64	1	1	29.44	84.9642
Q8NHX3	Angrgm-52 OS=Homo sapiens PE=2 SV=1 - [Q8NHX3_HUMAN]	2.07	1	1	29.42	25.9186
P42701	Interleukin-12 receptor subunit beta-1 OS=Homo sapiens GN=IL12RB1 PE=1 SV=1 - [I12R1_HUMAN]	0.76	1	2	29.39	73.0617
O75995	SAM and SH3 domain-containing protein 3 OS=Homo sapiens GN=SASH3 PE=1 SV=2 - [SASH3_HUMAN]	1.32	1	15	29.12	41.5698
B4DN06	Ribosomal protein L3, isoform CRA_i OS=Homo sapiens GN=RPL3 PE=2 SV=1 - [B4DN06_HUMAN]	6.56	1	1	27.99	13.9074
I6L957	HNRNPA2B1 protein OS=Homo sapiens GN=HNRNPA2B1 PE=2 SV=1 - [I6L957_HUMAN]	3.61	1	1	27.09	28.3941
A0A087WUI2	Heterogeneous nuclear ribonucleoproteins A2/B1 OS=Homo sapiens GN=HNRNPA2B1 PE=1 SV=1 - [A0A087WUI2_HUMAN]	3.45	1	1	27.09	29.817
P08138	Tumor necrosis factor receptor superfamily member 16 OS=Homo sapiens GN=NGFR PE=1 SV=1 - [TNR16_HUMAN]	1.64	1	1	27.06	45.1543
P16104	Histone H2AX OS=Homo sapiens GN=H2AFX PE=1 SV=2 - [H2AX_HUMAN]	4.9	1	2	25.83	15.1354
C9J0D1	Histone H2A OS=Homo sapiens GN=H2AFV PE=1 SV=1 - [C9J0D1_HUMAN]	5.74	1	2	25.83	13.155
B4DR52	Histone H2B OS=Homo sapiens PE=2 SV=1 - [B4DR52_HUMAN]	13.25	2	8	25.73	18.0297
Q0D2M2	HIST1H2BC protein OS=Homo sapiens GN=HIST1H2BC PE=2 SV=1 - [Q0D2M2_HUMAN]	17.46	2	8	25.73	13.8255
L0R5A1	Alternative protein CSF2RB OS=Homo sapiens GN=CSF2RB PE=4 SV=1 - [L0R5A1_HUMAN]	7.41	1	20	25.46	11.6381
E9PCY7	Heterogeneous nuclear ribonucleoprotein H OS=Homo sapiens GN=HNRNPH1 PE=1 SV=1 - [E9PCY7_HUMAN]	4.2	2	4	25.33	47.0574
Q6PYX1	Hepatitis B virus receptor binding protein (Fragment) OS=Homo sapiens PE=1 SV=1 - [Q6PYX1_HUMAN]	12.64	4	5	24.82	38.138
V9HW68	Epididymis luminal protein 214 OS=Homo sapiens GN=HEL-214 PE=2 SV=1 - [V9HW68_HUMAN]	10.43	5	6	24.82	51.6828
Q5EFE5	Anti-RhD monoclonal T125 gamma1 heavy chain OS=Homo sapiens PE=2 SV=1 - [Q5EFE5_HUMAN]	9.26	4	5	24.82	52.3293
Q3ZCU5	DLG4 protein (Fragment) OS=Homo sapiens GN=DLG4 PE=2 SV=1 - [Q3ZCU5_HUMAN]	1.09	1	1	24.77	61.4901
Q4ADV7	RAB6A-GEF complex partner protein 1 OS=Homo sapiens GN=RIC1 PE=1 SV=2 - [RIC1_HUMAN]	0.42	1	1	24.35	159.199
H0YEY5	Plakophilin-3 (Fragment) OS=Homo sapiens GN=PKP3 PE=1 SV=1 - [H0YEY5_HUMAN]	5.22	1	2	24.26	12.6355
Q96L21	60S ribosomal protein L10-like OS=Homo sapiens GN=RPL10L PE=1 SV=3 - [RL10L_HUMAN]	2.8	1	1	24.26	24.5027
D3DQU2	Tripeptidyl peptidase I, isoform CRA_a OS=Homo sapiens GN=TPP1 PE=4 SV=1 - [D3DQU2_HUMAN]	1.05	1	2	23.67	62.2222
Q9Y4W6	AFG3-like protein 2 OS=Homo sapiens GN=AFG3L2 PE=1 SV=2 - [AFG32_HUMAN]	0.75	1	2	23.67	88.5282
C9J9W0	Transient receptor potential cation channel subfamily V member 6 (Fragment) OS=Homo sapiens GN=TRPV6 PE=4 SV=1 - [C9J9W0_HUMAN]	5.74	1	1	23.59	13.7212
H9KV28	Protein diaphanous homolog 1 OS=Homo sapiens GN=DIAPH1 PE=1 SV=2 - [H9KV28_HUMAN]	0.57	1	1	23.59	136.765
A0RZB8	Diaphanous-1 OS=Homo sapiens GN=DIAPH1 PE=2 SV=1 - [A0RZB8_HUMAN]	0.55	1	1	23.59	140.083
Q9NP92	39S ribosomal protein S30, mitochondrial OS=Homo sapiens GN=MRPS30 PE=1 SV=2 - [RT30_HUMAN]	1.59	1	1	23.59	50.3328
A5A3E0	POTE ankyrin domain family member F OS=Homo sapiens GN=POTEF PE=1 SV=2 - [POTEF_HUMAN]	3.53	4	6	23.42	121.367
V9HVZ7	Epididymis luminal protein 176 OS=Homo sapiens GN=HEL-176 PE=2 SV=1 - [V9HVZ7_HUMAN]	13	3	7	23.42	25.0195
P63267	Actin, gamma-enteric smooth muscle OS=Homo sapiens GN=ACTG2 PE=1 SV=1 - [ACTH_HUMAN]	11.97	5	9	23.42	41.8498
P63261	Actin, cytoplasmic 2 OS=Homo sapiens GN=ACTG1 PE=1 SV=1 - [ACTG_HUMAN]	12	5	9	23.42	41.7658
P60709	Actin, cytoplasmic 1 OS=Homo sapiens GN=ACTB PE=1 SV=1 - [ACTB_HUMAN]	12	5	9	23.42	41.7097
P08254	Stromelysin-1 OS=Homo sapiens GN=MMP3 PE=1 SV=2 - [MMP3_HUMAN]	1.47	1	1	23.25	53.9433
Q8IVC0	Serpin peptidase inhibitor, clade D (Heparin cofactor), member 1 OS=Homo sapiens GN=SERPIND1 PE=2 SV=1 - [Q8IVC0_HUMAN]	1.4	1	1	23.25	56.9211
Q9HCM2	Plexin-A4 OS=Homo sapiens GN=PLXNA4 PE=1 SV=4 - [PLXA4_HUMAN]	0.37	1	1	23.25	212.318
H7C5N1	NEDD8 ultimate buster 1 (Fragment) OS=Homo sapiens GN=NUB1 PE=1 SV=1 - [H7C5N1_HUMAN]	3.47	1	1	23.25	22.3959
P40925	Malate dehydrogenase, cytoplasmic OS=Homo sapiens GN=MDH1 PE=1 SV=4 - [MDHC_HUMAN]	2.1	1	1	23.25	36.403
P05546	Heparin cofactor 2 OS=Homo sapiens GN=SERPIND1 PE=1 SV=3 - [HEP2_HUMAN]	1.4	1	1	23.25	57.0342
E9PJH4	40S ribosomal protein S3 OS=Homo sapiens GN=RPS3 PE=1 SV=1 - [E9PJH4_HUMAN]	6.96	1	2	22.61	12.9328
B3KYA4	Deoxyribonuclease OS=Homo sapiens PE=2 SV=1 - [B3KYA4_HUMAN]	3.82	1	1	22.47	33.5192
P56537	Eukaryotic translation initiation factor 6 OS=Homo sapiens GN=EIF6 PE=1 SV=1 - [IF6_HUMAN]	4.08	1	1	21.19	26.5822
P0C869	Cytosolic phospholipase A2 beta OS=Homo sapiens GN=PLA2G4B PE=1 SV=2 - [PA24B_HUMAN]	1.02	1	1	20.91	87.9225
Q6IBM8	U5-116KD protein OS=Homo sapiens GN=U5-116KD PE=2 SV=1 - [Q6IBM8_HUMAN]	0.82	1	1	20.02	109.39
Q8IXJ3	Small nuclear ribonucleoprotein component OS=Homo sapiens GN=SNRP116 PE=2 SV=1 - [Q8IXJ3_HUMAN]	0.94	1	1	20.02	95.311
Q15029	116 kDa U5 small nuclear ribonucleoprotein component OS=Homo sapiens GN=EFTUD2 PE=1 SV=1 - [U5S1_HUMAN]	0.82	1	1	20.02	109.366
O60290	Zinc finger protein 862 OS=Homo sapiens GN=ZNF862 PE=2 SV=2 - [ZN862_HUMAN]	0.6	1	1	0	131.57
Q6ZN19	Zinc finger protein 841 OS=Homo sapiens GN=ZNF841 PE=2 SV=1 - [ZN841_HUMAN]	0.62	1	1	0	93.0877
Q2TB10	Zinc finger protein 800 OS=Homo sapiens GN=ZNF800 PE=1 SV=1 - [ZN800_HUMAN]	1.2	1	1	0	75.1888
Q9NU63	Zinc finger protein 57 homolog OS=Homo sapiens GN=ZFP57 PE=1 SV=2 - [ZFP57_HUMAN]	2.65	2	2	0	51.8857
Q9C0D4	Zinc finger protein 518B OS=Homo sapiens GN=ZNF518B PE=2 SV=2 - [Z518B_HUMAN]	1.21	2	3	0	119.456
O60281	Zinc finger protein 292 OS=Homo sapiens GN=ZNF292 PE=1 SV=3 - [ZN292_HUMAN]	0.48	2	4	0	304.623
P52746	Zinc finger protein 142 OS=Homo sapiens GN=ZNF142 PE=1 SV=4 - [ZN142_HUMAN]	0.71	2	2	0	187.758
Q8IWR0	Zinc finger CCCH domain-containing protein 7A OS=Homo sapiens GN=ZC3H7A PE=1 SV=1 - [Z3H7A_HUMAN]	0.72	1	2	0	110.466
F8WB26	Zinc finger CCCH domain-containing protein 15 OS=Homo sapiens GN=ZC3H15 PE=1 SV=1 - [F8WB26_HUMAN]	4.76	1	1	0	11.8126
Q53FD0	Zinc finger C2HC domain-containing protein 1C OS=Homo sapiens GN=ZC2HC1C PE=1 SV=3 - [ZC21C_HUMAN]	1.1	1	1	0	51.6259
A0A1U9X8V4	ZFP57 OS=Homo sapiens PE=4 SV=1 - [A0A1U9X8V4_HUMAN]	2.24	2	2	0	61.2904
Q9HD64	X antigen family member 1 OS=Homo sapiens GN=XAGE1A PE=1 SV=3 - [XAGE1_HUMAN]	7.41	1	13	0	9.07188
Q9NZC7	WW domain-containing oxidoreductase OS=Homo sapiens GN=WWOX PE=1 SV=1 - [WWOX_HUMAN]	1.21	1	3	0	46.6472
B4DMI6	WDR45-like, isoform CRA_f OS=Homo sapiens GN=WDR45L PE=2 SV=1 - [B4DMI6_HUMAN]	1.58	1	2	0	35.1528
Q9Y4E6	WD repeat-containing protein 7 OS=Homo sapiens GN=WDR7 PE=1 SV=2 - [WDR7_HUMAN]	0.4	1	2	0	163.705
Q14722	Voltage-gated potassium channel subunit beta-1 OS=Homo sapiens GN=KCNAB1 PE=1 SV=1 - [KCAB1_HUMAN]	1.43	1	13	0	46.5339
Q16572	Vesicular acetylcholine transporter OS=Homo sapiens GN=SLC18A3 PE=1 SV=2 - [VACHT_HUMAN]	1.32	1	2	0	56.8668
A0A1U9X9D5	VARS2 OS=Homo sapiens PE=3 SV=1 - [A0A1U9X9D5_HUMAN]	0.64	1	2	0	121.591
B4E0K6	Valine--tRNA ligase, mitochondrial OS=Homo sapiens GN=VARS2 PE=1 SV=1 - [B4E0K6_HUMAN]	0.66	1	2	0	118.429
Q86VN1	Vacuolar protein-sorting-associated protein 36 OS=Homo sapiens GN=VPS36 PE=1 SV=1 - [VPS36_HUMAN]	1.55	1	1	0	43.7887
F5H2B9	Uveal autoantigen with coiled-coil domains and ankyrin repeats OS=Homo sapiens GN=UACA PE=1 SV=1 - [F5H2B9_HUMAN]	0.38	1	3	0	150.439
Q9NQX4	Unconventional myosin-Vc OS=Homo sapiens GN=MYO5C PE=1 SV=2 - [MYO5C_HUMAN]	0.34	1	12	0	202.682
H7C070	Uncharacterized protein KIAA1109 (Fragment) OS=Homo sapiens GN=KIAA1109 PE=1 SV=1 - [H7C070_HUMAN]	0.37	1	1	0	180.497
Q8IV33	Uncharacterized protein KIAA0825 OS=Homo sapiens GN=KIAA0825 PE=2 SV=2 - [K0825_HUMAN]	0.63	1	2	0	147.668
Q8N7P7	Uncharacterized protein FLJ40521 OS=Homo sapiens PE=2 SV=1 - [YH007_HUMAN]	2.21	1	3	0	48.2852
H0YDR2	Uncharacterized protein C6orf141 (Fragment) OS=Homo sapiens GN=C6orf141 PE=1 SV=1 - [H0YDR2_HUMAN]	8.33	1	1	0	7.99805
E9PNW5	Uncharacterized protein C4orf50 OS=Homo sapiens GN=C4orf50 PE=4 SV=2 - [E9PNW5_HUMAN]	0.4	1	4	0	167.043
Q68DN1	Uncharacterized protein C2orf16 OS=Homo sapiens GN=C2orf16 PE=2 SV=3 - [CB016_HUMAN]	0.35	1	1	0	224.183
Q3KP66	Uncharacterized protein C1orf106 OS=Homo sapiens GN=C1orf106 PE=2 SV=2 - [CA106_HUMAN]	0.75	1	2	0	72.8695
Q96DM3	Uncharacterized protein C18orf8 OS=Homo sapiens GN=C18orf8 PE=1 SV=2 - [MIC1_HUMAN]	0.91	1	7	0	74.9266
E2QRF0	Ubiquitinyl hydrolase 1 OS=Homo sapiens GN=USP45 PE=1 SV=1 - [E2QRF0_HUMAN]	1.04	1	2	0	86.0602
Q8N2K1	Ubiquitin-conjugating enzyme E2 J2 OS=Homo sapiens GN=UBE2J2 PE=1 SV=3 - [UB2J2_HUMAN]	1.93	1	1	0	28.88
Q9HAC8	Ubiquitin domain-containing protein 1 OS=Homo sapiens GN=UBTD1 PE=1 SV=1 - [UBTD1_HUMAN]	2.2	1	1	0	25.9223
Q70EL2	Ubiquitin carboxyl-terminal hydrolase 45 OS=Homo sapiens GN=USP45 PE=1 SV=3 - [UBP45_HUMAN]	0.98	1	2	0	91.6751
I3L0E4	Ubiquitin carboxyl-terminal hydrolase 17-like protein 10 OS=Homo sapiens GN=USP17L10 PE=3 SV=2 - [I3L0E4_HUMAN]	1.25	1	6	0	63.3887
B7ZKM7	UACA protein OS=Homo sapiens GN=UACA PE=2 SV=1 - [B7ZKM7_HUMAN]	0.38	1	3	0	150.469
O15116	U6 snRNA-associated Sm-like protein LSm1 OS=Homo sapiens GN=LSM1 PE=1 SV=1 - [LSM1_HUMAN]	4.51	1	3	0	15.1701
E7EPD8	Tyrosyl-DNA phosphodiesterase 1 OS=Homo sapiens GN=TDP1 PE=1 SV=1 - [E7EPD8_HUMAN]	1.36	1	2	0	65.998
M1VPF4	Tyrosine-protein kinase receptor OS=Homo sapiens GN=TPM3-ROS1 PE=2 SV=1 - [M1VPF4_HUMAN]	1.66	1	2	0	82.3675
Q59EQ2	Tyrosine 3-monooxygenase/tryptophan 5-monooxygenase activation protein, beta polypeptide variant (Fragment) OS=Homo sapiens PE=2 SV=1 - [Q59EQ2_HUMAN]	6.88	2	4	0	22.164
A0A087WYR3	Tumor protein D54 OS=Homo sapiens GN=TPD52L2 PE=1 SV=1 - [A0A087WYR3_HUMAN]	3.15	1	2	0	23.7503
E5RFR7	Tumor protein D52 OS=Homo sapiens GN=TPD52 PE=1 SV=1 - [E5RFR7_HUMAN]	6.31	1	1	0	12.3815
G3V4R8	Tubulin polyglutamylase TTLL5 OS=Homo sapiens GN=TTLL5 PE=1 SV=1 - [G3V4R8_HUMAN]	0.77	1	2	0	86.3846
J3KN67	Tropomyosin alpha-3 chain OS=Homo sapiens GN=TPM3 PE=1 SV=1 - [J3KN67_HUMAN]	4.21	1	2	0	33.2018
B7Z596	Tropomyosin alpha-1 chain OS=Homo sapiens GN=TPM1 PE=1 SV=1 - [B7Z596_HUMAN]	4.36	1	2	0	31.7333
B4DHS5	tRNA (guanine(26)-N(2))-dimethyltransferase OS=Homo sapiens PE=2 SV=1 - [B4DHS5_HUMAN]	1.13	1	1	0	58.3436
O14717	tRNA (cytosine(38)-C(5))-methyltransferase OS=Homo sapiens GN=TRDMT1 PE=1 SV=1 - [TRDMT_HUMAN]	1.28	1	1	0	44.5683
Q9UJA5	tRNA (adenine(58)-N(1))-methyltransferase non-catalytic subunit TRM6 OS=Homo sapiens GN=TRMT6 PE=1 SV=1 - [TRM6_HUMAN]	1.21	1	3	0	55.7643
A0A024R7G3	TRM1 tRNA methyltransferase 1 homolog (S. cerevisiae), isoform CRA_e OS=Homo sapiens GN=TRMT1 PE=3 SV=1 - [A0A024R7G3_HUMAN]	1.63	1	1	0	40.1955
Q14134	Tripartite motif-containing protein 29 OS=Homo sapiens GN=TRIM29 PE=1 SV=2 - [TRI29_HUMAN]	2.89	2	13	0	65.7933
B7ZLC3	TRIML2 protein OS=Homo sapiens GN=TRIML2 PE=2 SV=1 - [B7ZLC3_HUMAN]	2.18	1	4	0	46.8354
P40939	Trifunctional enzyme subunit alpha, mitochondrial OS=Homo sapiens GN=HADHA PE=1 SV=2 - [ECHA_HUMAN]	2.62	3	4	0	82.9469
Q9Y2Y6	Transmembrane protein 98 OS=Homo sapiens GN=TMEM98 PE=1 SV=1 - [TMM98_HUMAN]	2.21	1	3	0	24.5948
Q96HE8	Transmembrane protein 80 OS=Homo sapiens GN=TMEM80 PE=2 SV=3 - [TMM80_HUMAN]	4.76	1	3	0	18.1487
J3KSH5	Transmembrane protein 220 (Fragment) OS=Homo sapiens GN=TMEM220 PE=1 SV=2 - [J3KSH5_HUMAN]	6.98	1	2	0	9.53296
Q8NE00	Transmembrane protein 104 OS=Homo sapiens GN=TMEM104 PE=1 SV=2 - [TM104_HUMAN]	1.01	1	2	0	55.6424
Q5T4D3	Transmembrane and TPR repeat-containing protein 4 OS=Homo sapiens GN=TMTC4 PE=2 SV=2 - [TMTC4_HUMAN]	2.16	2	2	0	82.9376
Q96RE1	Translation elongation factor 1 alpha 1-like 14 OS=Homo sapiens GN=EEF1A1L14 PE=2 SV=1 - [Q96RE1_HUMAN]	9.3	6	11	0	42.9973
Q03167	Transforming growth factor beta receptor type 3 OS=Homo sapiens GN=TGFBR3 PE=1 SV=3 - [TGBR3_HUMAN]	0.82	1	2	0	93.4398
O95359	Transforming acidic coiled-coil-containing protein 2 OS=Homo sapiens GN=TACC2 PE=1 SV=3 - [TACC2_HUMAN]	0.17	1	1	0	309.237
Q86YP4	Transcriptional repressor p66-alpha OS=Homo sapiens GN=GATAD2A PE=1 SV=1 - [P66A_HUMAN]	0.79	1	2	0	68.0205
P46100	Transcriptional regulator ATRX OS=Homo sapiens GN=ATRX PE=1 SV=5 - [ATRX_HUMAN]	0.24	1	2	0	282.411
Q86TJ2	Transcriptional adapter 2-beta OS=Homo sapiens GN=TADA2B PE=1 SV=2 - [TAD2B_HUMAN]	1.19	1	2	0	48.4396
C9J856	Transcription initiation factor TFIID subunit 8 OS=Homo sapiens GN=TAF8 PE=1 SV=1 - [C9J856_HUMAN]	10	1	1	0	6.75948
K7ENH8	Transcription factor E2-alpha (Fragment) OS=Homo sapiens GN=TCF3 PE=1 SV=2 - [K7ENH8_HUMAN]	5.73	2	2	0	33.5778
G3V220	Transcription elongation regulator 1 OS=Homo sapiens GN=TCERG1 PE=1 SV=1 - [G3V220_HUMAN]	1.36	2	2	0	116.094
Q8TCG4	TPMsk1 (Fragment) OS=Homo sapiens GN=TPM1 PE=2 SV=1 - [Q8TCG4_HUMAN]	5.91	1	2	0	23.7401
Q5VU62	TPM3 protein OS=Homo sapiens GN=TPM3 PE=2 SV=1 - [Q5VU62_HUMAN]	7.59	1	2	0	18.4814
B9VJ68	Toll-like receptor 5 OS=Homo sapiens GN=TLR5 PE=3 SV=1 - [B9VJ68_HUMAN]	0.82	1	5	0	97.5657
Q15025	TNFAIP3-interacting protein 1 OS=Homo sapiens GN=TNIP1 PE=1 SV=2 - [TNIP1_HUMAN]	0.94	1	1	0	71.8196
A0A0A0MRA3	Titin OS=Homo sapiens GN=TTN PE=1 SV=1 - [A0A0A0MRA3_HUMAN]	0.06	3	3	0	3012.11
Q9P031	Thyroid transcription factor 1-associated protein 26 OS=Homo sapiens GN=CCDC59 PE=1 SV=2 - [TAP26_HUMAN]	2.07	1	3	0	28.652
K7EP46	Thimet oligopeptidase OS=Homo sapiens GN=THOP1 PE=1 SV=1 - [K7EP46_HUMAN]	1.94	2	2	0	65.0778
Q9H0W7	THAP domain-containing protein 2 OS=Homo sapiens GN=THAP2 PE=1 SV=1 - [THAP2_HUMAN]	2.63	1	1	0	26.2429
G3V3A5	Tetratricopeptide repeat protein 6 OS=Homo sapiens GN=TTC6 PE=1 SV=1 - [G3V3A5_HUMAN]	0.8	2	3	0	216.307
A1L157	Tetraspanin-11 OS=Homo sapiens GN=TSPAN11 PE=2 SV=2 - [TSN11_HUMAN]	2.37	1	1	0	28.2264
B4DV40	Tetraspanin OS=Homo sapiens PE=2 SV=1 - [B4DV40_HUMAN]	2.47	1	1	0	26.4594
Q8IWB9	Testis-expressed protein 2 OS=Homo sapiens GN=TEX2 PE=1 SV=2 - [TEX2_HUMAN]	0.8	1	1	0	125.224
A0A140VK87	Testis secretory sperm-binding protein Li 214e OS=Homo sapiens PE=2 SV=1 - [A0A140VK87_HUMAN]	0.71	1	1	0	111.856
A0A140VJJ5	Testicular tissue protein Li 69 OS=Homo sapiens PE=2 SV=1 - [A0A140VJJ5_HUMAN]	0.76	1	1	0	119.698
Q86US8	Telomerase-binding protein EST1A OS=Homo sapiens GN=SMG6 PE=1 SV=2 - [EST1A_HUMAN]	0.92	2	2	0	160.363
G3V2A4	Telomerase protein component 1 OS=Homo sapiens GN=TEP1 PE=1 SV=1 - [G3V2A4_HUMAN]	0.26	1	1	0	207.809
Q32Q25	TDP1 protein OS=Homo sapiens GN=TDP1 PE=2 SV=1 - [Q32Q25_HUMAN]	1.36	1	2	0	66.0401
Q6PJU3	TCF3 protein (Fragment) OS=Homo sapiens GN=TCF3 PE=2 SV=1 - [Q6PJU3_HUMAN]	1.86	1	1	0	61.0259
Q96BZ9	TBC1 domain family member 20 OS=Homo sapiens GN=TBC1D20 PE=1 SV=1 - [TBC20_HUMAN]	1.99	1	1	0	45.8258
Q8IWY7	Tau-tubulin kinase OS=Homo sapiens GN=TTBK2 PE=1 SV=1 - [Q8IWY7_HUMAN]	0.79	2	11	0	182.353
A4PBF7	TATA box binding protein (TBP)-associated factor 4B OS=Homo sapiens GN=taf4b PE=2 SV=1 - [A4PBF7_HUMAN]	0.69	1	1	0	91.8441
Q86V37	TAOK2 protein (Fragment) OS=Homo sapiens GN=TAOK2 PE=2 SV=1 - [Q86V37_HUMAN]	0.49	1	1	0	158.93
B7ZMJ9	TACC2 protein OS=Homo sapiens GN=TACC2 PE=2 SV=1 - [B7ZMJ9_HUMAN]	0.17	1	1	0	302.401
B5MEF5	Sushi, nidogen and EGF-like domain-containing protein 1 OS=Homo sapiens GN=SNED1 PE=1 SV=3 - [B5MEF5_HUMAN]	1.17	1	3	0	65.1822
Q96SB8	Structural maintenance of chromosomes protein 6 OS=Homo sapiens GN=SMC6 PE=1 SV=2 - [SMC6_HUMAN]	1.19	2	7	0	126.246
Q9P246	Stromal interaction molecule 2 OS=Homo sapiens GN=STIM2 PE=1 SV=2 - [STIM2_HUMAN]	0.8	1	1	0	83.9182
O75533	Splicing factor 3B subunit 1 OS=Homo sapiens GN=SF3B1 PE=1 SV=3 - [SF3B1_HUMAN]	0.46	1	2	0	145.738
Q8N4H0	Spermatogenesis associated 6-like protein OS=Homo sapiens GN=SPATA6L PE=2 SV=2 - [SPA6L_HUMAN]	2.3	1	2	0	45.0299
Q96S08	Some homology with holliday junction DNA helicase RUVB like OS=Homo sapiens GN=RUVBL PE=4 SV=1 - [Q96S08_HUMAN]	0.68	1	1	0	129.274
Q96JW4	Solute carrier family 41 member 2 OS=Homo sapiens GN=SLC41A2 PE=1 SV=2 - [S41A2_HUMAN]	1.22	1	1	0	62.4335
F2FB34	SOGA OS=Homo sapiens PE=2 SV=1 - [F2FB34_HUMAN]	0.37	1	3	0	151.155
Q9UQD0	Sodium channel protein type 8 subunit alpha OS=Homo sapiens GN=SCN8A PE=1 SV=1 - [SCN8A_HUMAN]	0.25	1	1	0	225.134
A0A024R5C3	Slingshot homolog 3 (Drosophila), isoform CRA_g OS=Homo sapiens GN=SSH3 PE=4 SV=1 - [A0A024R5C3_HUMAN]	1.75	1	2	0	43.2373
Q9NTI5	Sister chromatid cohesion protein PDS5 homolog B OS=Homo sapiens GN=PDS5B PE=1 SV=1 - [PDS5B_HUMAN]	0.41	1	4	0	164.563
A7VJH3	Silent information regulator 2 OS=Homo sapiens GN=SIR2 PE=2 SV=1 - [A7VJH3_HUMAN]	1.54	1	1	0	43.1843
Q8IX30	Signal peptide, CUB and EGF-like domain-containing protein 3 OS=Homo sapiens GN=SCUBE3 PE=1 SV=1 - [SCUB3_HUMAN]	0.6	1	1	0	109.21
E9PJN4	Short transient receptor potential channel 6 OS=Homo sapiens GN=TRPC6 PE=1 SV=1 - [E9PJN4_HUMAN]	1.06	1	1	0	97.2387
A0MZ66	Shootin-1 OS=Homo sapiens GN=SHTN1 PE=1 SV=4 - [SHOT1_HUMAN]	0.95	1	1	0	71.5957
Q8IZ09	SH3GL2 protein OS=Homo sapiens GN=SH3GL2 PE=1 SV=1 - [Q8IZ09_HUMAN]	2.15	1	1	0	31.7502
Q8IVP1	SH3-domain GRB2-like 3, isoform CRA_a OS=Homo sapiens GN=SH3GL3 PE=2 SV=1 - [Q8IVP1_HUMAN]	2.08	1	1	0	32.5789
D3DRJ2	SH3-domain GRB2-like 2, isoform CRA_b OS=Homo sapiens GN=SH3GL2 PE=4 SV=1 - [D3DRJ2_HUMAN]	1.89	1	1	0	36.1492
Q9UQD4	SH3-containing Grb-2-like 1 protein OS=Homo sapiens PE=4 SV=1 - [Q9UQD4_HUMAN]	1.7	1	1	0	39.8151
Q8IW75	Serpin A12 OS=Homo sapiens GN=SERPINA12 PE=1 SV=1 - [SPA12_HUMAN]	1.45	1	1	0	47.145
H0YA74	Serine-rich coiled-coil domain-containing protein 1 (Fragment) OS=Homo sapiens GN=CCSER1 PE=1 SV=1 - [H0YA74_HUMAN]	3.65	1	1	0	14.9726
Q8TF05	Serine/threonine-protein phosphatase 4 regulatory subunit 1 OS=Homo sapiens GN=PPP4R1 PE=1 SV=1 - [PP4R1_HUMAN]	0.53	1	1	0	106.936
Q9BYP7	Serine/threonine-protein kinase WNK3 OS=Homo sapiens GN=WNK3 PE=1 SV=3 - [WNK3_HUMAN]	0.39	1	13	0	198.292
Q6DT37	Serine/threonine-protein kinase MRCK gamma OS=Homo sapiens GN=CDC42BPG PE=1 SV=2 - [MRCKG_HUMAN]	0.71	2	4	0	172.352
H7C1Y2	Serine/threonine/tyrosine-interacting-like protein 1 (Fragment) OS=Homo sapiens GN=STYXL1 PE=1 SV=1 - [H7C1Y2_HUMAN]	11.76	1	1	0	7.47556
Q53GB2	SEC13-like 1 isoform b variant (Fragment) OS=Homo sapiens PE=2 SV=1 - [Q53GB2_HUMAN]	1.55	1	2	0	35.4881
Q8IYM2	Schlafen family member 12 OS=Homo sapiens GN=SLFN12 PE=2 SV=2 - [SLN12_HUMAN]	1.21	1	1	0	66.9292
H0YKU6	SAFB-like transcription modulator (Fragment) OS=Homo sapiens GN=SLTM PE=1 SV=1 - [H0YKU6_HUMAN]	3.41	1	1	0	22.9183
Q9NZJ4	Sacsin OS=Homo sapiens GN=SACS PE=1 SV=2 - [SACS_HUMAN]	0.11	1	3	0	520.795
Q8N5C6	S1 RNA-binding domain-containing protein 1 OS=Homo sapiens GN=SRBD1 PE=1 SV=2 - [SRBD1_HUMAN]	0.6	1	3	0	111.705
Q2MKA7	R-spondin-1 OS=Homo sapiens GN=RSPO1 PE=1 SV=1 - [RSPO1_HUMAN]	3.04	2	6	0	28.9402
Q32Q62	RSL1D1 protein (Fragment) OS=Homo sapiens GN=RSL1D1 PE=2 SV=1 - [Q32Q62_HUMAN]	1.29	1	1	0	52.1326
Q9Y324	rRNA-processing protein FCF1 homolog OS=Homo sapiens GN=FCF1 PE=2 SV=1 - [FCF1_HUMAN]	3.54	1	2	0	23.3542
E9PIF2	RNA helicase OS=Homo sapiens GN=DDX10 PE=1 SV=1 - [E9PIF2_HUMAN]	0.84	1	4	0	96.3952
A0A1U9X8F1	RING1 OS=Homo sapiens PE=4 SV=1 - [A0A1U9X8F1_HUMAN]	1.23	1	1	0	42.3307
A0A024RCR9	Ring finger protein 1, isoform CRA_a OS=Homo sapiens GN=RING1 PE=4 SV=1 - [A0A024RCR9_HUMAN]	1.33	1	1	0	39.1212
Q96DX4	RING finger and SPRY domain-containing protein 1 OS=Homo sapiens GN=RSPRY1 PE=1 SV=1 - [RSPRY_HUMAN]	0.87	1	1	0	64.1389
Q59FS3	Ribosomal protein S7 variant (Fragment) OS=Homo sapiens PE=2 SV=1 - [Q59FS3_HUMAN]	6.41	1	1	0	8.94475
O76021	Ribosomal L1 domain-containing protein 1 OS=Homo sapiens GN=RSL1D1 PE=1 SV=3 - [RL1D1_HUMAN]	1.22	1	1	0	54.9389
Q1RLL8	Ribonuclease L (2',5'-oligoisoadenylate synthetase-dependent) OS=Homo sapiens GN=RNASEL PE=1 SV=1 - [Q1RLL8_HUMAN]	0.94	1	3	0	83.4665
Q8IUC4	Rhophilin-2 OS=Homo sapiens GN=RHPN2 PE=1 SV=1 - [RHPN2_HUMAN]	1.02	1	1	0	76.9444
G3V3N2	Rho guanine nucleotide exchange factor 40 (Fragment) OS=Homo sapiens GN=ARHGEF40 PE=1 SV=1 - [G3V3N2_HUMAN]	0.9	1	3	0	58.8095
Q9NXL2	Rho guanine nucleotide exchange factor 38 OS=Homo sapiens GN=ARHGEF38 PE=2 SV=2 - [ARH38_HUMAN]	0.77	1	3	0	89.0212
O15013	Rho guanine nucleotide exchange factor 10 OS=Homo sapiens GN=ARHGEF10 PE=1 SV=4 - [ARHGA_HUMAN]	0.44	1	1	0	151.516
Q5VT97	Rho GTPase-activating protein SYDE2 OS=Homo sapiens GN=SYDE2 PE=1 SV=2 - [SYDE2_HUMAN]	0.59	1	1	0	133.146
O43182	Rho GTPase-activating protein 6 OS=Homo sapiens GN=ARHGAP6 PE=1 SV=3 - [RHG06_HUMAN]	0.92	1	1	0	105.882
I3L2N6	Retinoid-inducible serine carboxypeptidase OS=Homo sapiens GN=SCPEP1 PE=1 SV=1 - [I3L2N6_HUMAN]	3.4	1	1	0	16.5084
Q86UN2	Reticulon-4 receptor-like 1 OS=Homo sapiens GN=RTN4RL1 PE=1 SV=1 - [R4RL1_HUMAN]	2.27	1	3	0	49.0342
E5RK52	Replication initiator 1 OS=Homo sapiens GN=REPIN1 PE=4 SV=1 - [E5RK52_HUMAN]	5.88	1	2	0	13.5821
Q96DB5	Regulator of microtubule dynamics protein 1 OS=Homo sapiens GN=RMDN1 PE=1 SV=1 - [RMD1_HUMAN]	1.59	1	1	0	35.7854
Q86UR5	Regulating synaptic membrane exocytosis protein 1 OS=Homo sapiens GN=RIMS1 PE=1 SV=1 - [RIMS1_HUMAN]	0.35	1	3	0	188.956
Q16827	Receptor-type tyrosine-protein phosphatase O OS=Homo sapiens GN=PTPRO PE=1 SV=2 - [PTPRO_HUMAN]	0.49	1	2	0	138.255
Q8TDY2	RB1-inducible coiled-coil protein 1 OS=Homo sapiens GN=RB1CC1 PE=1 SV=3 - [RBCC1_HUMAN]	0.38	1	5	0	182.975
Q96JH8	Ras-associating and dilute domain-containing protein OS=Homo sapiens GN=RADIL PE=1 SV=5 - [RADIL_HUMAN]	1.12	2	2	0	117.381
Q13576	Ras GTPase-activating-like protein IQGAP2 OS=Homo sapiens GN=IQGAP2 PE=1 SV=4 - [IQGA2_HUMAN]	0.32	1	1	0	180.465
Q8WZA2	Rap guanine nucleotide exchange factor 4 OS=Homo sapiens GN=RAPGEF4 PE=1 SV=1 - [RPGF4_HUMAN]	0.69	1	3	0	115.448
J3KQ37	RANBP2-like and GRIP domain-containing protein 8 OS=Homo sapiens GN=RGPD8 PE=1 SV=1 - [J3KQ37_HUMAN]	0.37	1	3	0	183.15
A0A1W2PNU4	RANBP2-like and GRIP domain-containing protein 2 OS=Homo sapiens GN=RGPD2 PE=4 SV=1 - [A0A1W2PNU4_HUMAN]	1.14	2	4	0	197.087
P0DJD0	RANBP2-like and GRIP domain-containing protein 1 OS=Homo sapiens GN=RGPD1 PE=2 SV=1 - [RGPD1_HUMAN]	1.14	2	4	0	196.539
Q12967	Ral guanine nucleotide dissociation stimulator OS=Homo sapiens GN=RALGDS PE=1 SV=2 - [GNDS_HUMAN]	0.77	1	1	0	100.544
A0A024R656	RAD51-like 1 (S. cerevisiae), isoform CRA_a OS=Homo sapiens GN=RAD51L1 PE=4 SV=1 - [A0A024R656_HUMAN]	1.71	1	2	0	38.2327
F2Z2T0	Rab-like protein 6 OS=Homo sapiens GN=RABL6 PE=1 SV=1 - [F2Z2T0_HUMAN]	1.03	1	3	0	53.8251
H7C204	Rabenosyn-5 (Fragment) OS=Homo sapiens GN=RBSN PE=1 SV=1 - [H7C204_HUMAN]	3.85	1	2	0	18.3546
Q5R372	Rab GTPase-activating protein 1-like OS=Homo sapiens GN=RABGAP1L PE=1 SV=1 - [RBG1L_HUMAN]	0.86	1	1	0	92.4539
Q9UNE2	Rab effector Noc2 OS=Homo sapiens GN=RPH3AL PE=1 SV=1 - [RPH3L_HUMAN]	1.59	1	16	0	34.4423
B1APH4	Putative zinc finger protein 487 OS=Homo sapiens GN=ZNF487 PE=5 SV=3 - [ZN487_HUMAN]	1.34	1	1	0	51.5912
Q96MK3	Pseudokinase FAM20A OS=Homo sapiens GN=FAM20A PE=1 SV=4 - [FA20A_HUMAN]	1.11	1	3	0	61.3775
A0A0A0MR07	Proto-oncogene vav OS=Homo sapiens GN=VAV1 PE=1 SV=1 - [A0A0A0MR07_HUMAN]	0.61	1	3	0	95.6949
Q9Y5G6	Protocadherin gamma-A7 OS=Homo sapiens GN=PCDHGA7 PE=2 SV=1 - [PCDG7_HUMAN]	0.64	1	1	0	101.659
Q9Y5G8	Protocadherin gamma-A5 OS=Homo sapiens GN=PCDHGA5 PE=2 SV=1 - [PCDG5_HUMAN]	0.64	1	1	0	100.873
Q9Y5H2	Protocadherin gamma-A11 OS=Homo sapiens GN=PCDHGA11 PE=2 SV=1 - [PCDGB_HUMAN]	0.64	1	1	0	101.48
Q15453	Protein-serine/threonine kinase (Fragment) OS=Homo sapiens PE=2 SV=1 - [Q15453_HUMAN]	12.5	1	4	0	5.44576
G3V2W1	Protein Z-dependent protease inhibitor OS=Homo sapiens GN=SERPINA10 PE=1 SV=1 - [G3V2W1_HUMAN]	1.65	1	1	0	55.0783
A0A1W2PNX8	Protein unc-45 homolog A OS=Homo sapiens GN=UNC45A PE=1 SV=1 - [A0A1W2PNX8_HUMAN]	0.55	1	1	0	118.319
Q68D10	Protein SPT2 homolog OS=Homo sapiens GN=SPTY2D1 PE=1 SV=3 - [SPT2_HUMAN]	1.17	1	1	0	75.5525
O94964	Protein SOGA1 OS=Homo sapiens GN=SOGA1 PE=1 SV=2 - [SOGA1_HUMAN]	0.35	1	3	0	159.661
Q8TF72	Protein Shroom3 OS=Homo sapiens GN=SHROOM3 PE=1 SV=2 - [SHRM3_HUMAN]	0.45	1	6	0	216.724
P55735	Protein SEC13 homolog OS=Homo sapiens GN=SEC13 PE=1 SV=3 - [SEC13_HUMAN]	1.55	1	2	0	35.5181
Q9NVU7	Protein SDA1 homolog OS=Homo sapiens GN=SDAD1 PE=1 SV=3 - [SDA1_HUMAN]	1.02	1	2	0	79.8205
C9JUG3	Protein phosphatase Slingshot homolog 3 OS=Homo sapiens GN=SSH3 PE=1 SV=1 - [C9JUG3_HUMAN]	1.78	1	2	0	42.684
O75688	Protein phosphatase 1B OS=Homo sapiens GN=PPM1B PE=1 SV=1 - [PPM1B_HUMAN]	1.25	1	4	0	52.6094
F8WBY8	Protein phosphatase 1 regulatory subunit 21 OS=Homo sapiens GN=PPP1R21 PE=1 SV=1 - [F8WBY8_HUMAN]	11.32	1	2	0	6.2573
H0YIM2	Protein phosphatase 1 regulatory subunit 12A (Fragment) OS=Homo sapiens GN=PPP1R12A PE=1 SV=1 - [H0YIM2_HUMAN]	4.26	1	3	0	22.0309
Q9BPW8	Protein NipSnap homolog 1 OS=Homo sapiens GN=NIPSNAP1 PE=1 SV=1 - [NIPS1_HUMAN]	1.76	1	1	0	33.2888
Q5U4N7	Protein GDF5OS, mitochondrial OS=Homo sapiens GN=GDF5OS PE=2 SV=2 - [GDF5O_HUMAN]	2.4	1	1	0	28.1937
Q8IZU1	Protein FAM9A OS=Homo sapiens GN=FAM9A PE=1 SV=1 - [FAM9A_HUMAN]	1.51	1	2	0	37.3165
P98173	Protein FAM3A OS=Homo sapiens GN=FAM3A PE=1 SV=2 - [FAM3A_HUMAN]	3.04	1	1	0	25.136
Q6P995	Protein FAM171B OS=Homo sapiens GN=FAM171B PE=2 SV=3 - [F171B_HUMAN]	0.73	1	1	0	92.1238
Q96MY7	Protein FAM161B OS=Homo sapiens GN=FAM161B PE=1 SV=2 - [F161B_HUMAN]	2.16	2	4	0	73.602
B7Z2K3	Protein FAM13C OS=Homo sapiens GN=FAM13C PE=2 SV=1 - [B7Z2K3_HUMAN]	0.87	1	1	0	64.3369
Q9H098	Protein FAM107B OS=Homo sapiens GN=FAM107B PE=1 SV=1 - [F107B_HUMAN]	4.58	1	3	0	15.5483
Q8TD16	Protein bicaudal D homolog 2 OS=Homo sapiens GN=BICD2 PE=1 SV=1 - [BICD2_HUMAN]	0.73	1	2	0	93.476
Q96G01	Protein bicaudal D homolog 1 OS=Homo sapiens GN=BICD1 PE=1 SV=3 - [BICD1_HUMAN]	0.62	1	2	0	110.682
Q6IB22	Proteasome subunit beta type OS=Homo sapiens GN=PSMB10 PE=2 SV=1 - [Q6IB22_HUMAN]	2.2	1	1	0	28.9181
E5RIQ8	Probable tRNA(His) guanylyltransferase OS=Homo sapiens GN=THG1L PE=1 SV=1 - [E5RIQ8_HUMAN]	4.03	1	1	0	14.5894
O94823	Probable phospholipid-transporting ATPase VB OS=Homo sapiens GN=ATP10B PE=2 SV=2 - [AT10B_HUMAN]	0.48	1	1	0	165.284
Q4AC99	Probable inactive 1-aminocyclopropane-1-carboxylate synthase-like protein 2 OS=Homo sapiens GN=ACCSL PE=2 SV=3 - [1A1L2_HUMAN]	0.88	1	6	0	65.207
Q86YR7	Probable guanine nucleotide exchange factor MCF2L2 OS=Homo sapiens GN=MCF2L2 PE=2 SV=3 - [MF2L2_HUMAN]	0.72	1	1	0	126.913
O00155	Probable G-protein coupled receptor 25 OS=Homo sapiens GN=GPR25 PE=1 SV=2 - [GPR25_HUMAN]	1.66	1	1	0	38.7536
Q8N7C3	Probable E3 ubiquitin-protein ligase TRIML2 OS=Homo sapiens GN=TRIML2 PE=1 SV=1 - [TRIMM_HUMAN]	2.33	1	4	0	43.9552
A0A0C4DG89	Probable ATP-dependent RNA helicase DDX46 OS=Homo sapiens GN=DDX46 PE=1 SV=1 - [A0A0C4DG89_HUMAN]	0.68	1	2	0	117.389
Q9UJV9	Probable ATP-dependent RNA helicase DDX41 OS=Homo sapiens GN=DDX41 PE=1 SV=2 - [DDX41_HUMAN]	1.45	1	4	0	69.793
Q13206	Probable ATP-dependent RNA helicase DDX10 OS=Homo sapiens GN=DDX10 PE=1 SV=2 - [DDX10_HUMAN]	0.8	1	4	0	100.825
H7C149	Probable 2-oxoglutarate dehydrogenase E1 component DHKTD1, mitochondrial (Fragment) OS=Homo sapiens GN=DHTKD1 PE=1 SV=1 - [H7C149_HUMAN]	3.27	3	3	0	23.8319
Q6P2Q9	Pre-mRNA-processing-splicing factor 8 OS=Homo sapiens GN=PRPF8 PE=1 SV=2 - [PRP8_HUMAN]	0.3	1	1	0	273.427
M0R314	Pregnancy-specific beta-1-glycoprotein 6 (Fragment) OS=Homo sapiens GN=PSG6 PE=4 SV=1 - [M0R314_HUMAN]	6.17	1	1	0	9.19669
Q59F51	PREDICTED: F-box protein 10 variant (Fragment) OS=Homo sapiens PE=2 SV=1 - [Q59F51_HUMAN]	0.6	1	1	0	90.9001
B7ZLX4	PPP1R9A protein OS=Homo sapiens GN=PPP1R9A PE=2 SV=1 - [B7ZLX4_HUMAN]	0.46	1	2	0	122.348
P51164	Potassium-transporting ATPase subunit beta OS=Homo sapiens GN=ATP4B PE=1 SV=1 - [ATP4B_HUMAN]	2.06	1	2	0	33.3454
Q96L42	Potassium voltage-gated channel subfamily H member 8 OS=Homo sapiens GN=KCNH8 PE=2 SV=2 - [KCNH8_HUMAN]	0.54	1	1	0	123.726
P22459	Potassium voltage-gated channel subfamily A member 4 OS=Homo sapiens GN=KCNA4 PE=1 SV=2 - [KCNA4_HUMAN]	1.07	1	2	0	73.211
Q5MJQ3	Potassium voltage-gated channel beta subunit OS=Homo sapiens GN=KCNAB1 PE=2 SV=1 - [Q5MJQ3_HUMAN]	1.61	1	13	0	41.3215
D4YW74	Polytrophin OS=Homo sapiens GN=TROPH PE=2 SV=1 - [D4YW74_HUMAN]	0.28	3	5	0	788.036
Q8TBY8	Polyamine-modulated factor 1-binding protein 1 OS=Homo sapiens GN=PMFBP1 PE=2 SV=1 - [PMFBP_HUMAN]	1.08	2	2	0	118.958
Q86SQ0	Pleckstrin homology-like domain family B member 2 OS=Homo sapiens GN=PHLDB2 PE=1 SV=2 - [PHLB2_HUMAN]	0.4	1	1	0	142.07
Q86UU1	Pleckstrin homology-like domain family B member 1 OS=Homo sapiens GN=PHLDB1 PE=1 SV=1 - [PHLB1_HUMAN]	0.51	1	2	0	151.068
B7ZM86	PIK3C2B protein OS=Homo sapiens GN=PIK3C2B PE=2 SV=1 - [B7ZM86_HUMAN]	0.93	2	2	0	181.537
Q9H4Z3	Phosphorylated CTD-interacting factor 1 OS=Homo sapiens GN=PCIF1 PE=1 SV=1 - [PCIF1_HUMAN]	0.71	1	1	0	80.6184
Q9H814	Phosphorylated adapter RNA export protein OS=Homo sapiens GN=PHAX PE=1 SV=1 - [PHAX_HUMAN]	1.52	1	1	0	44.3751
O60256	Phosphoribosyl pyrophosphate synthase-associated protein 2 OS=Homo sapiens GN=PRPSAP2 PE=1 SV=1 - [KPRB_HUMAN]	3.79	2	5	0	40.8994
B4DP31	Phosphoribosyl pyrophosphate synthase-associated protein 1 OS=Homo sapiens GN=PRPSAP1 PE=1 SV=1 - [B4DP31_HUMAN]	2.48	1	4	0	31.2454
B7ZM61	Phosphoinositide phospholipase C OS=Homo sapiens GN=PLCE1 PE=2 SV=1 - [B7ZM61_HUMAN]	0.26	1	2	0	256.941
O00750	Phosphatidylinositol 4-phosphate 3-kinase C2 domain-containing subunit beta OS=Homo sapiens GN=PIK3C2B PE=1 SV=2 - [P3C2B_HUMAN]	0.92	2	2	0	184.651
M0R386	Phosphatidylinositol 3-kinase catalytic subunit type 3 OS=Homo sapiens GN=PIK3C3 PE=1 SV=1 - [M0R386_HUMAN]	4.85	1	1	0	11.3798
Q96KR7	Phosphatase and actin regulator 3 OS=Homo sapiens GN=PHACTR3 PE=1 SV=1 - [PHAR3_HUMAN]	1.07	1	1	0	62.5143
Q06830	Peroxiredoxin-1 OS=Homo sapiens GN=PRDX1 PE=1 SV=1 - [PRDX1_HUMAN]	4.02	1	1	0	22.0963
P41219	Peripherin OS=Homo sapiens GN=PRPH PE=1 SV=2 - [PERI_HUMAN]	2.34	1	4	0	53.6184
Q7Z6Z6	Patatin-like phospholipase domain-containing protein 5 OS=Homo sapiens GN=PNPLA5 PE=2 SV=1 - [PLPL5_HUMAN]	1.17	1	1	0	47.8814
J7FRP4	PA28 gamma variant 5 OS=Homo sapiens PE=2 SV=1 - [J7FRP4_HUMAN]	6.47	2	4	0	19.8185
R9S3C3	p14ARF/p16INK4a fusion protein OS=Homo sapiens GN=p14ARF PE=2 SV=1 - [R9S3C3_HUMAN]	5.88	1	2	0	18.52
Q8WXP9	Oxysterol-binding protein OS=Homo sapiens GN=OSBPL7 PE=2 SV=1 - [Q8WXP9_HUMAN]	0.83	1	3	0	95.3997
Q86UW0	Ovarian epithelial carcinoma-related protein OS=Homo sapiens PE=2 SV=1 - [Q86UW0_HUMAN]	2.02	1	2	0	29.4735
Q12880	ORF1 OS=Homo sapiens PE=4 SV=1 - [Q12880_HUMAN]	1.48	1	2	0	40.0757
Q8N323	NXPE family member 1 OS=Homo sapiens GN=NXPE1 PE=2 SV=2 - [NXPE1_HUMAN]	1.1	1	5	0	63.1375
Q8WVJ2	NudC domain-containing protein 2 OS=Homo sapiens GN=NUDCD2 PE=1 SV=1 - [NUDC2_HUMAN]	5.1	1	3	0	17.6647
Q99733	Nucleosome assembly protein 1-like 4 OS=Homo sapiens GN=NAP1L4 PE=1 SV=1 - [NP1L4_HUMAN]	1.6	1	1	0	42.7969
P12270	Nucleoprotein TPR OS=Homo sapiens GN=TPR PE=1 SV=3 - [TPR_HUMAN]	0.21	1	2	0	267.131
O15381	Nuclear valosin-containing protein-like OS=Homo sapiens GN=NVL PE=1 SV=1 - [NVL_HUMAN]	0.58	1	1	0	94.991
Q15406	Nuclear receptor subfamily 6 group A member 1 OS=Homo sapiens GN=NR6A1 PE=1 SV=2 - [NR6A1_HUMAN]	1.25	1	4	0	54.3476
Q7Z516	Nuclear receptor co-repressor OS=Homo sapiens PE=2 SV=1 - [Q7Z516_HUMAN]	0.26	1	1	0	258.722
Q9NZP6	Nuclear pore-associated protein 1 OS=Homo sapiens GN=NPAP1 PE=1 SV=2 - [NPAP1_HUMAN]	0.43	1	1	0	120.878
H3BRD9	Nuclear pore complex protein Nup93 (Fragment) OS=Homo sapiens GN=NUP93 PE=1 SV=1 - [H3BRD9_HUMAN]	4.29	1	1	0	15.916
A3KC71	Nuclear envelope protein okuribin OS=Homo sapiens GN=okuribin PE=2 SV=1 - [A3KC71_HUMAN]	0.84	1	2	0	108.119
Q67C35	NOEL1C OS=Homo sapiens GN=RAB11FIP1 PE=2 SV=1 - [Q67C35_HUMAN]	0.91	1	1	0	58.0222
A8K670	Nitric oxide synthase-interacting protein OS=Homo sapiens PE=2 SV=1 - [A8K670_HUMAN]	3.65	1	2	0	33.163
Q8NCF5	NFATC2-interacting protein OS=Homo sapiens GN=NFATC2IP PE=1 SV=1 - [NF2IP_HUMAN]	2.15	1	1	0	45.7888
Q0ZGT2	Nexilin OS=Homo sapiens GN=NEXN PE=1 SV=1 - [NEXN_HUMAN]	0.74	1	3	0	80.6087
O94856	Neurofascin OS=Homo sapiens GN=NFASC PE=1 SV=4 - [NFASC_HUMAN]	0.45	1	2	0	149.933
Q09666	Neuroblast differentiation-associated protein AHNAK OS=Homo sapiens GN=AHNAK PE=1 SV=2 - [AHNK_HUMAN]	0.1	1	1	0	628.699
Q9Y4C0	Neurexin-3 OS=Homo sapiens GN=NRXN3 PE=1 SV=4 - [NRX3A_HUMAN]	0.37	1	1	0	180.484
Q9ULJ8	Neurabin-1 OS=Homo sapiens GN=PPP1R9A PE=1 SV=2 - [NEB1_HUMAN]	0.46	1	2	0	123.267
Q8WXH0	Nesprin-2 OS=Homo sapiens GN=SYNE2 PE=1 SV=3 - [SYNE2_HUMAN]	0.28	3	5	0	795.944
A4F1Y0	Nef-associated factor 1 SNP OS=Homo sapiens GN=NAF1 PE=2 SV=1 - [A4F1Y0_HUMAN]	0.95	1	1	0	71.1513
Q9H009	Nascent polypeptide-associated complex subunit alpha-2 OS=Homo sapiens GN=NACA2 PE=1 SV=1 - [NACA2_HUMAN]	2.33	1	2	0	23.2088
G3V0I5	NADH dehydrogenase [ubiquinone] flavoprotein 1, mitochondrial OS=Homo sapiens GN=NDUFV1 PE=1 SV=1 - [G3V0I5_HUMAN]	1.31	1	1	0	50.0224
P59044	NACHT, LRR and PYD domains-containing protein 6 OS=Homo sapiens GN=NLRP6 PE=1 SV=2 - [NLRP6_HUMAN]	0.78	1	1	0	98.7055
P59045	NACHT, LRR and PYD domains-containing protein 11 OS=Homo sapiens GN=NLRP11 PE=2 SV=2 - [NAL11_HUMAN]	0.97	2	3	0	117.702
Q86U44	N6-adenosine-methyltransferase 70 kDa subunit OS=Homo sapiens GN=METTL3 PE=1 SV=2 - [MTA70_HUMAN]	1.38	1	2	0	64.4335
Q9Y2K3	Myosin-15 OS=Homo sapiens GN=MYH15 PE=1 SV=5 - [MYH15_HUMAN]	0.31	1	1	0	224.479
A0A1W2PPU9	Myosin phosphatase Rho-interacting protein (Fragment) OS=Homo sapiens GN=MPRIP PE=1 SV=1 - [A0A1W2PPU9_HUMAN]	1.7	1	6	0	32.3503
Q8TBZ2	MYCBP-associated protein OS=Homo sapiens GN=MYCBPAP PE=1 SV=2 - [MYBPP_HUMAN]	0.74	1	1	0	108.085
Q8NCY6	Myb/SANT-like DNA-binding domain-containing protein 4 OS=Homo sapiens GN=MSANTD4 PE=1 SV=1 - [MSD4_HUMAN]	2.9	1	1	0	41.1244
Q3V638	Mutated endophilin A1 BAR domain OS=Homo sapiens GN=SH3GL2 PE=2 SV=1 - [Q3V638_HUMAN]	2.67	1	1	0	25.7673
E1A689	Mutant Apo B 100 OS=Homo sapiens PE=2 SV=1 - [E1A689_HUMAN]	0.3	2	3	0	489.513
O15146	Muscle, skeletal receptor tyrosine-protein kinase OS=Homo sapiens GN=MUSK PE=1 SV=1 - [MUSK_HUMAN]	0.69	1	1	0	96.9931
Q9UDY8	Mucosa-associated lymphoid tissue lymphoma translocation protein 1 OS=Homo sapiens GN=MALT1 PE=1 SV=1 - [MALT1_HUMAN]	0.61	1	1	0	92.2131
Q58EZ6	Mucin-like protocadherin OS=Homo sapiens GN=MUPCDH PE=2 SV=1 - [Q58EZ6_HUMAN]	1.08	1	2	0	69.5671
W4VSR2	MPN domain-containing protein OS=Homo sapiens GN=MPND PE=1 SV=1 - [W4VSR2_HUMAN]	1.2	1	2	0	54.1258
P30305	M-phase inducer phosphatase 2 OS=Homo sapiens GN=CDC25B PE=1 SV=2 - [MPIP2_HUMAN]	0.86	1	1	0	64.9465
P50219	Motor neuron and pancreas homeobox protein 1 OS=Homo sapiens GN=MNX1 PE=1 SV=3 - [MNX1_HUMAN]	2.49	1	1	0	40.5441
Q9BYG3	MKI67 FHA domain-interacting nucleolar phosphoprotein OS=Homo sapiens GN=NIFK PE=1 SV=1 - [MK67I_HUMAN]	4.1	2	2	0	34.201
Q8NB16	Mixed lineage kinase domain-like protein OS=Homo sapiens GN=MLKL PE=1 SV=1 - [MLKL_HUMAN]	2.76	2	2	0	54.4445
I3L203	Misshapen-like kinase 1 (Fragment) OS=Homo sapiens GN=MINK1 PE=4 SV=1 - [I3L203_HUMAN]	13.21	1	1	0	5.63494
P46821	Microtubule-associated protein 1B OS=Homo sapiens GN=MAP1B PE=1 SV=2 - [MAP1B_HUMAN]	0.36	1	1	0	270.468
Q9Y4B5	Microtubule cross-linking factor 1 OS=Homo sapiens GN=MTCL1 PE=1 SV=5 - [MTCL1_HUMAN]	0.26	1	3	0	209.397
Q96EZ8	Microspherule protein 1 OS=Homo sapiens GN=MCRS1 PE=1 SV=1 - [MCRS1_HUMAN]	1.52	1	3	0	51.7712
Q96QZ7	Membrane-associated guanylate kinase, WW and PDZ domain-containing protein 1 OS=Homo sapiens GN=MAGI1 PE=1 SV=3 - [MAGI1_HUMAN]	0.4	1	5	0	164.481
Q16853	Membrane primary amine oxidase OS=Homo sapiens GN=AOC3 PE=1 SV=3 - [AOC3_HUMAN]	0.66	1	1	0	84.5683
Q9UNF1	Melanoma-associated antigen D2 OS=Homo sapiens GN=MAGED2 PE=1 SV=2 - [MAGD2_HUMAN]	3.63	2	2	0	64.9144
Q9P086	Mediator of RNA polymerase II transcription subunit 11 OS=Homo sapiens GN=MED11 PE=1 SV=2 - [MED11_HUMAN]	4.27	1	2	0	13.1207
B7ZMI1	MED12L protein OS=Homo sapiens GN=MED12L PE=2 SV=1 - [B7ZMI1_HUMAN]	0.28	1	3	0	203.623
F5H5R4	Mas-related G-protein-coupled receptor member F OS=Homo sapiens GN=MRGPRF PE=4 SV=1 - [F5H5R4_HUMAN]	7.69	1	2	0	10.6071
A0A087WZ62	Mannosyltransferase OS=Homo sapiens PE=3 SV=1 - [A0A087WZ62_HUMAN]	0.83	1	1	0	95.86
Q96J80	Mammalian ependymin related protein 1 OS=Homo sapiens GN=MERP1 PE=2 SV=1 - [Q96J80_HUMAN]	3.2	2	3	0	38.1163
A0JLV1	LRRC37A3 protein (Fragment) OS=Homo sapiens GN=LRRC37A3 PE=2 SV=1 - [A0JLV1_HUMAN]	1.71	2	2	0	71.7138
B7ZMC4	LRRC37A2 protein (Fragment) OS=Homo sapiens GN=LRRC37A2 PE=2 SV=1 - [B7ZMC4_HUMAN]	0.56	1	1	0	99.4479
Q6XYD6	LP2477 OS=Homo sapiens GN=LINC00094 PE=2 SV=1 - [Q6XYD6_HUMAN]	4.8	1	1	0	13.5311
O75197	Low-density lipoprotein receptor-related protein 5 OS=Homo sapiens GN=LRP5 PE=1 SV=2 - [LRP5_HUMAN]	0.5	1	1	0	179.03
Q59EX8	Low density lipoprotein receptor-related protein 6 variant (Fragment) OS=Homo sapiens PE=2 SV=1 - [Q59EX8_HUMAN]	0.81	2	2	0	165.289
A0A0G2JLC4	Lipopolysaccharide-induced tumor necrosis factor-alpha factor (Fragment) OS=Homo sapiens GN=LITAF PE=4 SV=1 - [A0A0G2JLC4_HUMAN]	70	1	1	0	1.1165
H3BVI4	Lipase maturation factor OS=Homo sapiens GN=LMF1 PE=1 SV=1 - [H3BVI4_HUMAN]	1.71	1	3	0	40.1216
Q9UN81	LINE-1 retrotransposable element ORF1 protein OS=Homo sapiens GN=L1RE1 PE=1 SV=1 - [LORF1_HUMAN]	1.48	1	2	0	40.0307
Q15401	Line-1 repeat mRNA with 2 open reading frames OS=Homo sapiens PE=2 SV=1 - [Q15401_HUMAN]	1.48	1	2	0	39.8345
G5EA03	LIM and calponin homology domains-containing protein 1 OS=Homo sapiens GN=LIMCH1 PE=1 SV=1 - [G5EA03_HUMAN]	0.48	1	1	0	164.337
B4DSF2	Leucine-rich repeat-containing protein 37A3 OS=Homo sapiens GN=LRRC37A3 PE=1 SV=1 - [B4DSF2_HUMAN]	1.64	2	2	0	75.1577
E9PP10	Leucine-rich repeat-containing protein 37A OS=Homo sapiens GN=LRRC37A PE=1 SV=1 - [E9PP10_HUMAN]	0.68	1	1	0	82.7146
Q9H2I8	Leucine-rich melanocyte differentiation-associated protein OS=Homo sapiens GN=LRMDA PE=1 SV=1 - [LRMDA_HUMAN]	3.54	1	1	0	22.5537
P24043	Laminin subunit alpha-2 OS=Homo sapiens GN=LAMA2 PE=1 SV=4 - [LAMA2_HUMAN]	0.22	1	2	0	343.684
A0JNT2	KRT83 protein OS=Homo sapiens GN=KRT83 PE=2 SV=1 - [A0JNT2_HUMAN]	1.57	1	7	0	49.6095
Q7L4M3	KRT8 protein OS=Homo sapiens PE=2 SV=1 - [Q7L4M3_HUMAN]	12.19	4	8	0	30.8015
D3DP61	KM-HN-1 protein, isoform CRA_a OS=Homo sapiens GN=KM-HN-1 PE=4 SV=1 - [D3DP61_HUMAN]	0.87	1	1	0	68.004
G3V4Y7	Kinectin OS=Homo sapiens GN=KTN1 PE=1 SV=1 - [G3V4Y7_HUMAN]	1.18	1	1	0	68.9015
A8K122	KIAA1946, isoform CRA_b OS=Homo sapiens GN=KIAA1946 PE=2 SV=1 - [A8K122_HUMAN]	0.73	1	1	0	92.2519
A5YKK5	KIAA0232 OS=Homo sapiens GN=KIAA0232 PE=2 SV=1 - [A5YKK5_HUMAN]	0.57	1	2	0	154.706
E5RFN1	Kelch-like protein 7 OS=Homo sapiens GN=KLHL7 PE=1 SV=1 - [E5RFN1_HUMAN]	17.5	1	1	0	4.39534
H0Y343	Jouberin (Fragment) OS=Homo sapiens GN=AHI1 PE=1 SV=1 - [H0Y343_HUMAN]	1.35	1	1	0	76.3212
E1YMX4	Isoform CDC25B7 OS=Homo sapiens GN=CDC25B PE=2 SV=1 - [E1YMX4_HUMAN]	1.17	1	1	0	49.4416
Q2TAA2	Isoamyl acetate-hydrolyzing esterase 1 homolog OS=Homo sapiens GN=IAH1 PE=1 SV=1 - [IAH1_HUMAN]	2.02	1	1	0	27.581
Q24JQ5	ISLR2 protein OS=Homo sapiens GN=ISLR2 PE=1 SV=1 - [Q24JQ5_HUMAN]	1.8	1	3	0	36.2105
Q9Y283	Inversin OS=Homo sapiens GN=INVS PE=1 SV=2 - [INVS_HUMAN]	0.56	1	1	0	117.753
P01574	Interferon beta OS=Homo sapiens GN=IFNB1 PE=1 SV=1 - [IFNB_HUMAN]	3.21	1	1	0	22.2795
P18564	Integrin beta-6 OS=Homo sapiens GN=ITGB6 PE=1 SV=2 - [ITB6_HUMAN]	1.02	1	1	0	85.8793
P35568	Insulin receptor substrate 1 OS=Homo sapiens GN=IRS1 PE=1 SV=1 - [IRS1_HUMAN]	0.48	1	1	0	131.509
B4E3N5	Inactive rhomboid protein OS=Homo sapiens PE=2 SV=1 - [B4E3N5_HUMAN]	1.04	1	1	0	64.1573
Q6UXK2	Immunoglobulin superfamily containing leucine-rich repeat protein 2 OS=Homo sapiens GN=ISLR2 PE=2 SV=1 - [ISLR2_HUMAN]	0.81	1	3	0	78.9411
Q9NXX0	ILF3 protein OS=Homo sapiens GN=ILF3 PE=1 SV=1 - [Q9NXX0_HUMAN]	4.43	1	2	0	17.7417
I7GY10	Hypoxia-inducible factor1alpha OS=Homo sapiens GN=HIF-1A PE=2 SV=1 - [I7GY10_HUMAN]	7.89	1	2	0	8.64462
S4R3N1	HSPE1-MOB4 readthrough OS=Homo sapiens GN=HSPE1-MOB4 PE=3 SV=1 - [S4R3N1_HUMAN]	2.68	1	2	0	29.7177
O75806	HOXA-9B OS=Homo sapiens GN=HOXA-9 PE=4 SV=1 - [O75806_HUMAN]	1.87	1	1	0	30.5941
P28356	Homeobox protein Hox-D9 OS=Homo sapiens GN=HOXD9 PE=1 SV=5 - [HXD9_HUMAN]	1.42	1	1	0	36.4718
P31274	Homeobox protein Hox-C9 OS=Homo sapiens GN=HOXC9 PE=1 SV=3 - [HXC9_HUMAN]	1.92	1	1	0	29.2294
P31269	Homeobox protein Hox-A9 OS=Homo sapiens GN=HOXA9 PE=1 SV=4 - [HXA9_HUMAN]	1.84	1	1	0	30.153
Q03828	Homeobox even-skipped homolog protein 2 OS=Homo sapiens GN=EVX2 PE=2 SV=2 - [EVX2_HUMAN]	5.67	1	2	0	47.7704
Q0VAS5	Histone H4 OS=Homo sapiens GN=HIST1H4H PE=2 SV=1 - [Q0VAS5_HUMAN]	27.18	3	11	0	11.3073
O14607	Histone demethylase UTY OS=Homo sapiens GN=UTY PE=1 SV=2 - [UTY_HUMAN]	0.45	1	1	0	149.453
O75446	Histone deacetylase complex subunit SAP30 OS=Homo sapiens GN=SAP30 PE=1 SV=1 - [SAP30_HUMAN]	4.09	1	2	0	23.2919
A1L407	Histone cluster 1, H1t OS=Homo sapiens GN=HIST1H1T PE=2 SV=1 - [A1L407_HUMAN]	9.66	2	4	0	22.0197
A0A0B4J1S2	High affinity immunoglobulin alpha and immunoglobulin mu Fc receptor OS=Homo sapiens GN=FCAMR PE=1 SV=1 - [A0A0B4J1S2_HUMAN]	1.21	1	2	0	62.1395
O95263	High affinity cAMP-specific and IBMX-insensitive 3',5'-cyclic phosphodiesterase 8B OS=Homo sapiens GN=PDE8B PE=1 SV=2 - [PDE8B_HUMAN]	0.68	1	4	0	98.9162
B4DLD0	Hexosyltransferase OS=Homo sapiens PE=2 SV=1 - [B4DLD0_HUMAN]	0.94	1	2	0	61.4844
P52272	Heterogeneous nuclear ribonucleoprotein M OS=Homo sapiens GN=HNRNPM PE=1 SV=3 - [HNRPM_HUMAN]	4.25	4	4	0	77.4643
O14979	Heterogeneous nuclear ribonucleoprotein D-like OS=Homo sapiens GN=HNRNPDL PE=1 SV=3 - [HNRDL_HUMAN]	1.19	1	1	0	46.4091
P28906	Hematopoietic progenitor cell antigen CD34 OS=Homo sapiens GN=CD34 PE=1 SV=2 - [CD34_HUMAN]	1.56	1	1	0	40.6914
Q9NXP7	Gypsy retrotransposon integrase-like protein 1 OS=Homo sapiens GN=GIN1 PE=1 SV=3 - [GIN1_HUMAN]	1.15	1	2	0	59.8047
Q8N8V2	Guanylate-binding protein 7 OS=Homo sapiens GN=GBP7 PE=2 SV=2 - [GBP7_HUMAN]	0.94	1	1	0	72.4671
A0A087X0X2	Growth/differentiation factor 6 OS=Homo sapiens GN=GDF6 PE=1 SV=1 - [A0A087X0X2_HUMAN]	1.98	1	2	0	39.3043
P81274	G-protein-signaling modulator 2 OS=Homo sapiens GN=GPSM2 PE=1 SV=3 - [GPSM2_HUMAN]	0.88	1	2	0	76.6142
A0A0A0MRC4	G-protein-signaling modulator 1 OS=Homo sapiens GN=GPSM1 PE=1 SV=2 - [A0A0A0MRC4_HUMAN]	0.85	1	2	0	78.1783
Q5KU22	G-protein coupled receptor OS=Homo sapiens GN=KPG_006 PE=2 SV=1 - [Q5KU22_HUMAN]	0.92	1	1	0	60.0336
Q08379	Golgin subfamily A member 2 OS=Homo sapiens GN=GOLGA2 PE=1 SV=3 - [GOGA2_HUMAN]	0.8	1	1	0	113.017
Q9Y625	Glypican-6 OS=Homo sapiens GN=GPC6 PE=1 SV=1 - [GPC6_HUMAN]	0.9	1	1	0	62.6949
O75487	Glypican-4 OS=Homo sapiens GN=GPC4 PE=1 SV=4 - [GPC4_HUMAN]	0.9	1	1	0	62.3717
P23378	Glycine dehydrogenase (decarboxylating), mitochondrial OS=Homo sapiens GN=GLDC PE=1 SV=2 - [GCSP_HUMAN]	0.59	1	2	0	112.657
A0A1J0GNC2	Glycine cleavage system P protein OS=Homo sapiens PE=2 SV=1 - [A0A1J0GNC2_HUMAN]	0.66	1	2	0	101.329
P04406	Glyceraldehyde-3-phosphate dehydrogenase OS=Homo sapiens GN=GAPDH PE=1 SV=3 - [G3P_HUMAN]	1.79	1	1	0	36.0304
P07093	Glia-derived nexin OS=Homo sapiens GN=SERPINE2 PE=1 SV=1 - [GDN_HUMAN]	1.76	1	2	0	43.9742
F1DAM1	Germ cell nuclear factor OS=Homo sapiens GN=NR6A1 PE=2 SV=1 - [F1DAM1_HUMAN]	1.26	1	4	0	53.9604
Q12789	General transcription factor 3C polypeptide 1 OS=Homo sapiens GN=GTF3C1 PE=1 SV=4 - [TF3C1_HUMAN]	0.38	1	3	0	238.725
Q2TAA5	GDP-Man:Man(3)GlcNAc(2)-PP-Dol alpha-1,2-mannosyltransferase OS=Homo sapiens GN=ALG11 PE=1 SV=2 - [ALG11_HUMAN]	1.02	1	3	0	55.6149
A0PK23	GDF6 protein OS=Homo sapiens GN=GDF6 PE=2 SV=1 - [A0PK23_HUMAN]	1.98	1	2	0	39.3303
A0A024R7M6	GATA zinc finger domain containing 2A, isoform CRA_a OS=Homo sapiens GN=GATAD2A PE=4 SV=1 - [A0A024R7M6_HUMAN]	0.79	1	2	0	68.0916
Q5SZK8	FRAS1-related extracellular matrix protein 2 OS=Homo sapiens GN=FREM2 PE=1 SV=2 - [FREM2_HUMAN]	0.57	3	4	0	350.937
Q5CZC0	Fibrous sheath-interacting protein 2 OS=Homo sapiens GN=FSIP2 PE=2 SV=4 - [FSIP2_HUMAN]	0.22	3	5	0	780.119
Q9BRP7	Ferredoxin-fold anticodon-binding domain-containing protein 1 OS=Homo sapiens GN=FDXACB1 PE=1 SV=3 - [FDXA1_HUMAN]	1.12	1	1	0	70.3707
Q5SYB0	FERM and PDZ domain-containing protein 1 OS=Homo sapiens GN=FRMPD1 PE=1 SV=1 - [FRPD1_HUMAN]	0.38	1	1	0	173.328
J3QLH9	F-box/WD repeat-containing protein 10 OS=Homo sapiens GN=FBXW10 PE=4 SV=1 - [J3QLH9_HUMAN]	4.08	1	1	0	23.0531
Q9UF56	F-box/LRR-repeat protein 17 OS=Homo sapiens GN=FBXL17 PE=2 SV=3 - [FXL17_HUMAN]	1	1	2	0	75.6457
O75426	F-box only protein 24 OS=Homo sapiens GN=FBXO24 PE=1 SV=2 - [FBX24_HUMAN]	0.86	1	3	0	64.847
Q86XK2	F-box only protein 11 OS=Homo sapiens GN=FBXO11 PE=1 SV=3 - [FBX11_HUMAN]	0.65	1	1	0	103.52
J3KN78	F-box only protein 10 OS=Homo sapiens GN=FBXO10 PE=1 SV=1 - [J3KN78_HUMAN]	0.87	1	1	0	63.4158
H7C835	F-box and leucine-rich repeat protein 17 OS=Homo sapiens GN=FBXL17 PE=1 SV=1 - [H7C835_HUMAN]	1.51	1	2	0	51.5217
D3DWX8	Family with sequence similarity 3, member A, isoform CRA_c OS=Homo sapiens GN=FAM3A PE=1 SV=1 - [D3DWX8_HUMAN]	2.87	1	1	0	26.7033
Q8IYA5	FAM20A protein OS=Homo sapiens GN=FAM20A PE=2 SV=1 - [Q8IYA5_HUMAN]	2.43	1	3	0	27.9793
Q9Y5B9	FACT complex subunit SPT16 OS=Homo sapiens GN=SUPT16H PE=1 SV=1 - [SP16H_HUMAN]	0.57	1	1	0	119.838
Q8IXL6	Extracellular serine/threonine protein kinase FAM20C OS=Homo sapiens GN=FAM20C PE=1 SV=2 - [FA20C_HUMAN]	1.03	1	2	0	66.1925
Q9GZZ8	Extracellular glycoprotein lacritin OS=Homo sapiens GN=LACRT PE=1 SV=1 - [LACRT_HUMAN]	5.07	1	2	0	14.2373
Q96KP1	Exocyst complex component 2 OS=Homo sapiens GN=EXOC2 PE=1 SV=1 - [EXOC2_HUMAN]	0.65	1	1	0	104
Q9NY74	Ewing's tumor-associated antigen 1 OS=Homo sapiens GN=ETAA1 PE=1 SV=2 - [ETAA1_HUMAN]	0.54	1	1	0	103.376
Q8TBG4	Ethanolamine-phosphate phospho-lyase OS=Homo sapiens GN=ETNPPL PE=1 SV=1 - [AT2L1_HUMAN]	1.2	1	5	0	55.6353
Q8NAH0	Epididymis secretory sperm binding protein Li 82p OS=Homo sapiens GN=HEL-S-82p PE=2 SV=1 - [Q8NAH0_HUMAN]	4.94	1	2	0	28.2053
A0A0K0K1I0	Epididymis secretory protein Li 265 OS=Homo sapiens GN=HEL-S-265 PE=2 SV=1 - [A0A0K0K1I0_HUMAN]	4.23	1	2	0	32.8457
Q5HYB6	Epididymis luminal protein 189 OS=Homo sapiens GN=DKFZp686J1372 PE=1 SV=1 - [Q5HYB6_HUMAN]	5.17	1	2	0	27.1588
E7EU71	Ephrin type-A receptor 6 OS=Homo sapiens GN=EPHA6 PE=1 SV=1 - [E7EU71_HUMAN]	1.1	1	1	0	60.9435
C9JEM6	Ephrin type-A receptor 4 (Fragment) OS=Homo sapiens GN=EPHA4 PE=1 SV=1 - [C9JEM6_HUMAN]	4.76	1	1	0	14.8443
E2I6F6	Ephrin type-A receptor 3 variant (Fragment) OS=Homo sapiens GN=EPHA3 PE=2 SV=1 - [E2I6F6_HUMAN]	6	1	1	0	11.2826
A4D1W8	Ependymin related protein 1 (Zebrafish), isoform CRA_b OS=Homo sapiens GN=UCC1 PE=4 SV=1 - [A4D1W8_HUMAN]	3.2	2	3	0	38.1263
Q99963	Endophilin-A3 OS=Homo sapiens GN=SH3GL3 PE=1 SV=1 - [SH3G3_HUMAN]	1.73	1	1	0	39.26
Q99961	Endophilin-A2 OS=Homo sapiens GN=SH3GL1 PE=1 SV=1 - [SH3G1_HUMAN]	1.63	1	1	0	41.464
Q99962	Endophilin-A1 OS=Homo sapiens GN=SH3GL2 PE=1 SV=1 - [SH3G2_HUMAN]	1.7	1	1	0	39.9371
Q16577	Elongation factor 1-alpha 1 OS=Homo sapiens GN=PTI-1 PE=2 SV=1 - [Q16577_HUMAN]	7.29	5	10	0	42.7971
Q504Z0	EEF1A1 protein OS=Homo sapiens GN=EEF1A1 PE=2 SV=1 - [Q504Z0_HUMAN]	12.01	6	11	0	33.2212
A0A0C4DGT9	Ecto-NOX disulfide-thiol exchanger 2 OS=Homo sapiens GN=ENOX2 PE=1 SV=1 - [A0A0C4DGT9_HUMAN]	1.9	1	1	0	30.5111
Q6ZMW3	Echinoderm microtubule-associated protein-like 6 OS=Homo sapiens GN=EML6 PE=2 SV=2 - [EMAL6_HUMAN]	0.36	1	2	0	217.761
Q05BV3	Echinoderm microtubule-associated protein-like 5 OS=Homo sapiens GN=EML5 PE=2 SV=3 - [EMAL5_HUMAN]	0.36	1	2	0	219.287
Q5T4S7	E3 ubiquitin-protein ligase UBR4 OS=Homo sapiens GN=UBR4 PE=1 SV=1 - [UBR4_HUMAN]	0.15	1	2	0	573.476
Q9C026	E3 ubiquitin-protein ligase TRIM9 OS=Homo sapiens GN=TRIM9 PE=1 SV=1 - [TRIM9_HUMAN]	0.7	1	3	0	79.126
O94972	E3 ubiquitin-protein ligase TRIM37 OS=Homo sapiens GN=TRIM37 PE=1 SV=2 - [TRI37_HUMAN]	0.62	1	1	0	107.837
Q969K3	E3 ubiquitin-protein ligase RNF34 OS=Homo sapiens GN=RNF34 PE=1 SV=1 - [RNF34_HUMAN]	1.34	1	3	0	41.6135
P50876	E3 ubiquitin-protein ligase RNF144A OS=Homo sapiens GN=RNF144A PE=1 SV=2 - [R144A_HUMAN]	1.71	1	2	0	32.8667
Q5JSK4	E3 ubiquitin-protein ligase RNF128 (Fragment) OS=Homo sapiens GN=RNF128 PE=1 SV=1 - [Q5JSK4_HUMAN]	2.41	1	2	0	27.6382
X6RFN3	E3 ubiquitin-protein ligase RING2 (Fragment) OS=Homo sapiens GN=RNF2 PE=1 SV=2 - [X6RFN3_HUMAN]	2.04	1	1	0	27.2603
Q06587	E3 ubiquitin-protein ligase RING1 OS=Homo sapiens GN=RING1 PE=1 SV=2 - [RING1_HUMAN]	1.23	1	1	0	42.4028
A0A087WU39	E3 ubiquitin-protein ligase parkin OS=Homo sapiens GN=PRKN PE=1 SV=1 - [A0A087WU39_HUMAN]	2.99	1	1	0	21.777
O75592	E3 ubiquitin-protein ligase MYCBP2 OS=Homo sapiens GN=MYCBP2 PE=1 SV=3 - [MYCB2_HUMAN]	0.26	2	4	0	509.759
Q6UWE0	E3 ubiquitin-protein ligase LRSAM1 OS=Homo sapiens GN=LRSAM1 PE=1 SV=1 - [LRSM1_HUMAN]	0.83	1	2	0	83.541
P49792	E3 SUMO-protein ligase RanBP2 OS=Homo sapiens GN=RANBP2 PE=1 SV=2 - [RBP2_HUMAN]	0.43	2	4	0	357.974
F6QMI7	Dystonin OS=Homo sapiens GN=DST PE=1 SV=2 - [F6QMI7_HUMAN]	0.11	1	3	0	633.274
H0Y7V4	Dynein heavy chain 8, axonemal OS=Homo sapiens GN=DNAH8 PE=1 SV=1 - [H0Y7V4_HUMAN]	0.12	1	1	0	478.566
H0YBI3	Dynein heavy chain 14, axonemal (Fragment) OS=Homo sapiens GN=DNAH14 PE=4 SV=1 - [H0YBI3_HUMAN]	3.85	1	1	0	15.2893
B0I1S0	DYNC2H1 variant protein OS=Homo sapiens PE=2 SV=1 - [B0I1S0_HUMAN]	0.14	1	4	0	492.339
Q1HG44	Dual oxidase maturation factor 2 OS=Homo sapiens GN=DUOXA2 PE=1 SV=2 - [DOXA2_HUMAN]	1.88	1	1	0	34.7645
O60469	Down syndrome cell adhesion molecule OS=Homo sapiens GN=DSCAM PE=1 SV=2 - [DSCAM_HUMAN]	0.3	1	3	0	222.121
O15446	DNA-directed RNA polymerase I subunit RPA34 OS=Homo sapiens GN=CD3EAP PE=1 SV=1 - [RPA34_HUMAN]	1.18	1	13	0	54.9514
Q9H211	DNA replication factor Cdt1 OS=Homo sapiens GN=CDT1 PE=1 SV=3 - [CDT1_HUMAN]	1.1	1	2	0	60.3525
O15315	DNA repair protein RAD51 homolog 2 OS=Homo sapiens GN=RAD51B PE=1 SV=2 - [RA51B_HUMAN]	1.56	1	2	0	42.1686
P49642	DNA primase small subunit OS=Homo sapiens GN=PRIM1 PE=1 SV=1 - [PRI1_HUMAN]	1.67	1	1	0	49.8704
P20585	DNA mismatch repair protein Msh3 OS=Homo sapiens GN=MSH3 PE=1 SV=4 - [MSH3_HUMAN]	0.62	1	3	0	127.332
Q9NXL9	DNA helicase MCM9 OS=Homo sapiens GN=MCM9 PE=1 SV=4 - [MCM9_HUMAN]	0.7	1	1	0	127.233
A0A0U1U562	DNA cytosine-5 methyltransferase 2 isoform G OS=Homo sapiens GN=Dnmt2 PE=2 SV=1 - [A0A0U1U562_HUMAN]	1.36	1	1	0	42.0248
Q16832	Discoidin domain-containing receptor 2 OS=Homo sapiens GN=DDR2 PE=1 SV=2 - [DDR2_HUMAN]	0.58	1	1	0	96.6739
A8QI98	DIS3 OS=Homo sapiens PE=2 SV=1 - [A8QI98_HUMAN]	0.52	1	2	0	108.989
A0A158T700	Differentiation-associated catenin regulator OS=Homo sapiens PE=2 SV=1 - [A0A158T700_HUMAN]	1.08	1	2	0	69.4711
Q05D60	Deuterosome assembly protein 1 OS=Homo sapiens GN=DEUP1 PE=1 SV=2 - [DEUP1_HUMAN]	0.99	1	3	0	70.9327
E7EV40	Deleted in azoospermia-like (Fragment) OS=Homo sapiens GN=DAZL PE=1 SV=1 - [E7EV40_HUMAN]	2.45	1	1	0	22.5224
C9JZP6	Dehydrogenase/reductase SDR family member 2, mitochondrial (Fragment) OS=Homo sapiens GN=DHRS2 PE=1 SV=2 - [C9JZP6_HUMAN]	2.67	1	1	0	23.8028
Q96HP0	Dedicator of cytokinesis protein 6 OS=Homo sapiens GN=DOCK6 PE=1 SV=3 - [DOCK6_HUMAN]	0.29	1	1	0	229.414
Q5JSL3	Dedicator of cytokinesis protein 11 OS=Homo sapiens GN=DOCK11 PE=1 SV=2 - [DOC11_HUMAN]	0.39	1	1	0	237.519
P07585	Decorin OS=Homo sapiens GN=DCN PE=1 SV=1 - [PGS2_HUMAN]	1.95	1	2	0	39.7218
D3DQA6	DEAD (Asp-Glu-Ala-Asp) box polypeptide 46, isoform CRA_a OS=Homo sapiens GN=DDX46 PE=4 SV=1 - [D3DQA6_HUMAN]	0.79	1	2	0	100.33
A0SWV8	DAZL (Fragment) OS=Homo sapiens GN=DAZL PE=4 SV=1 - [A0SWV8_HUMAN]	6.25	1	1	0	8.53629
C9K084	Cytosolic 5'-nucleotidase 3A (Fragment) OS=Homo sapiens GN=NT5C3A PE=1 SV=1 - [C9K084_HUMAN]	23.81	1	2	0	4.68951
Q8NCM8	Cytoplasmic dynein 2 heavy chain 1 OS=Homo sapiens GN=DYNC2H1 PE=1 SV=4 - [DYHC2_HUMAN]	0.14	1	4	0	492.311
K7ENC6	Cyclin-dependent kinase inhibitor 2A OS=Homo sapiens GN=CDKN2A PE=1 SV=1 - [K7ENC6_HUMAN]	8.26	1	2	0	12.7354
Q14028	Cyclic nucleotide-gated cation channel beta-1 OS=Homo sapiens GN=CNGB1 PE=1 SV=2 - [CNGB1_HUMAN]	0.8	1	2	0	139.59
Q8N884	Cyclic GMP-AMP synthase OS=Homo sapiens GN=MB21D1 PE=1 SV=2 - [CGAS_HUMAN]	1.34	1	1	0	58.7774
F8WBB8	Cullin-associated NEDD8-dissociated protein 2 OS=Homo sapiens GN=CAND2 PE=1 SV=1 - [F8WBB8_HUMAN]	4.55	1	1	0	12.1871
Q20BI7	CTTNBP2 OS=Homo sapiens GN=CTTNBP2 PE=4 SV=1 - [Q20BI7_HUMAN]	0.3	1	3	0	180.753
Q49AD3	CTNNA2 protein OS=Homo sapiens GN=CTNNA2 PE=2 SV=1 - [Q49AD3_HUMAN]	1.02	1	4	0	76.3359
Q8IUB0	CTCL tumor antigen HD-CL-08 OS=Homo sapiens PE=2 SV=1 - [Q8IUB0_HUMAN]	10.25	6	11	0	38.6441
A0A024QYV8	CP110 protein, isoform CRA_a OS=Homo sapiens GN=CP110 PE=4 SV=1 - [A0A024QYV8_HUMAN]	0.5	1	2	0	111.171
Q8WZ74	Cortactin-binding protein 2 OS=Homo sapiens GN=CTTNBP2 PE=1 SV=1 - [CTTB2_HUMAN]	0.3	1	3	0	180.938
Q9BPX3	Condensin complex subunit 3 OS=Homo sapiens GN=NCAPG PE=1 SV=1 - [CND3_HUMAN]	0.79	1	1	0	114.262
D3DSM4	Collagen, type XVIII, alpha 1, isoform CRA_d OS=Homo sapiens GN=COL18A1 PE=4 SV=1 - [D3DSM4_HUMAN]	0.45	1	1	0	135.426
Q9BW85	Coiled-coil domain-containing protein 94 OS=Homo sapiens GN=CCDC94 PE=1 SV=1 - [CCD94_HUMAN]	1.55	1	3	0	37.0627
O95170	CMT1A duplicated region transcript 1 protein OS=Homo sapiens GN=CDRT1 PE=2 SV=3 - [CDRT1_HUMAN]	1.06	1	1	0	85.3146
B9EK46	Cingulin OS=Homo sapiens GN=CGN PE=2 SV=1 - [B9EK46_HUMAN]	1.5	3	3	0	137.02
E7EXA6	Chromosome transmission fidelity protein 18 homolog OS=Homo sapiens GN=CHTF18 PE=1 SV=2 - [E7EXA6_HUMAN]	0.82	1	1	0	107.365
Q70JA7	Chondroitin sulfate synthase 3 OS=Homo sapiens GN=CHSY3 PE=2 SV=3 - [CHSS3_HUMAN]	0.57	1	2	0	100.221
Q86X52	Chondroitin sulfate synthase 1 OS=Homo sapiens GN=CHSY1 PE=1 SV=3 - [CHSS1_HUMAN]	0.62	1	2	0	91.7257
O43633	Charged multivesicular body protein 2a OS=Homo sapiens GN=CHMP2A PE=1 SV=1 - [CHM2A_HUMAN]	2.7	1	1	0	25.0879
Q9UNM1	Chaperonin 10-related protein (Fragment) OS=Homo sapiens GN=EPFP1 PE=3 SV=1 - [Q9UNM1_HUMAN]	7.22	1	2	0	10.2886
B2RP65	Centrosomal protein 110kDa OS=Homo sapiens GN=CEP110 PE=2 SV=1 - [B2RP65_HUMAN]	0.43	2	4	0	268.75
Q9BS16	Centromere protein K OS=Homo sapiens GN=CENPK PE=1 SV=1 - [CENPK_HUMAN]	2.23	1	1	0	31.6352
Q7Z7A1	Centriolin OS=Homo sapiens GN=CNTRL PE=1 SV=2 - [CNTRL_HUMAN]	0.43	2	4	0	268.72
Q9NX58	Cell growth-regulating nucleolar protein OS=Homo sapiens GN=LYAR PE=1 SV=2 - [LYAR_HUMAN]	1.32	1	1	0	43.5879
Q86Y33	Cell division cycle protein 20 homolog B OS=Homo sapiens GN=CDC20B PE=1 SV=3 - [CD20B_HUMAN]	1.93	1	1	0	57.2989
Q9ULG6	Cell cycle progression protein 1 OS=Homo sapiens GN=CCPG1 PE=1 SV=3 - [CCPG1_HUMAN]	0.66	1	1	0	87.2861
Q3C1E7	CD34 antigen OS=Homo sapiens GN=CD34 PE=4 SV=1 - [Q3C1E7_HUMAN]	1.83	1	1	0	35.0649
H0YAV9	CCR4-NOT transcription complex subunit 7 (Fragment) OS=Homo sapiens GN=CNOT7 PE=1 SV=1 - [H0YAV9_HUMAN]	2.4	1	6	0	24.2241
H7C2X6	Cation channel sperm-associated protein 2 (Fragment) OS=Homo sapiens GN=CATSPER2 PE=4 SV=1 - [H7C2X6_HUMAN]	61.54	1	4	0	1.46868
A0A0A0MRI5	Catenin alpha-2 OS=Homo sapiens GN=CTNNA2 PE=1 SV=1 - [A0A0A0MRI5_HUMAN]	1.23	1	4	0	62.7126
P35221	Catenin alpha-1 OS=Homo sapiens GN=CTNNA1 PE=1 SV=1 - [CTNA1_HUMAN]	0.77	1	4	0	100.009
O43916	Carbohydrate sulfotransferase 1 OS=Homo sapiens GN=CHST1 PE=1 SV=1 - [CHST1_HUMAN]	2.19	1	1	0	46.6852
Q8ND23	Capping protein, Arp2/3 and myosin-I linker protein 3 OS=Homo sapiens GN=CARMIL3 PE=2 SV=2 - [CARL3_HUMAN]	0.44	1	3	0	150.137
Q7Z479	Calpain 7 OS=Homo sapiens GN=CAPN7 PE=1 SV=1 - [Q7Z479_HUMAN]	0.62	1	2	0	92.5948
Q9HBB8	Cadherin-related family member 5 OS=Homo sapiens GN=CDHR5 PE=1 SV=3 - [CDHR5_HUMAN]	0.83	1	2	0	88.1687
J3QR60	Cadherin-3 (Fragment) OS=Homo sapiens GN=CDH3 PE=1 SV=1 - [J3QR60_HUMAN]	10.17	1	3	0	6.65445
A4QMX9	C2orf16 protein (Fragment) OS=Homo sapiens GN=C2orf16 PE=2 SV=1 - [A4QMX9_HUMAN]	0.73	1	1	0	109.997
Q9Y426	C2 domain-containing protein 2 OS=Homo sapiens GN=C2CD2 PE=1 SV=2 - [C2CD2_HUMAN]	1.29	2	4	0	75.4861
Q96MP8	BTB/POZ domain-containing protein KCTD7 OS=Homo sapiens GN=KCTD7 PE=1 SV=1 - [KCTD7_HUMAN]	2.08	1	4	0	33.1105
Q9BX70	BTB/POZ domain-containing protein 2 OS=Homo sapiens GN=BTBD2 PE=1 SV=1 - [BTBD2_HUMAN]	1.14	1	5	0	55.8961
Q58F21	Bromodomain testis-specific protein OS=Homo sapiens GN=BRDT PE=1 SV=4 - [BRDT_HUMAN]	1.16	2	3	0	107.887
P07738	Bisphosphoglycerate mutase OS=Homo sapiens GN=BPGM PE=1 SV=2 - [PMGE_HUMAN]	1.93	1	1	0	29.9865
A8MVZ6	BICD1 protein OS=Homo sapiens GN=BICD1 PE=1 SV=3 - [A8MVZ6_HUMAN]	0.73	1	2	0	94.8278
B2R6X2	Beta-glucuronidase OS=Homo sapiens PE=2 SV=1 - [B2R6X2_HUMAN]	0.92	1	4	0	74.6586
P15291	Beta-1,4-galactosyltransferase 1 OS=Homo sapiens GN=B4GALT1 PE=1 SV=5 - [B4GT1_HUMAN]	1.51	1	2	0	43.8923
A0A075B747	BAH and coiled-coil domain-containing protein 1 OS=Homo sapiens GN=BAHCC1 PE=1 SV=2 - [A0A075B747_HUMAN]	0.61	2	2	0	279.843
J3QRJ6	ATP-dependent RNA helicase DDX25 (Fragment) OS=Homo sapiens GN=DDX25 PE=1 SV=1 - [J3QRJ6_HUMAN]	8.96	1	1	0	7.71098
P33897	ATP-binding cassette sub-family D member 1 OS=Homo sapiens GN=ABCD1 PE=1 SV=2 - [ABCD1_HUMAN]	0.67	1	1	0	82.8845
Q8WWZ4	ATP-binding cassette sub-family A member 10 OS=Homo sapiens GN=ABCA10 PE=2 SV=3 - [ABCAA_HUMAN]	0.39	1	2	0	175.676
Q2YDW8	ATP10B protein (Fragment) OS=Homo sapiens GN=ATP10B PE=1 SV=1 - [Q2YDW8_HUMAN]	1.26	1	1	0	61.7258
P25705	ATP synthase subunit alpha, mitochondrial OS=Homo sapiens GN=ATP5A1 PE=1 SV=1 - [ATPA_HUMAN]	6.87	5	9	0	59.7136
D3VVG2	Ataxin 3 variant m OS=Homo sapiens GN=ATXN3 PE=2 SV=1 - [D3VVG2_HUMAN]	1.99	1	1	0	34.7704
Q6P1M9	Armadillo repeat-containing X-linked protein 5 OS=Homo sapiens GN=ARMCX5 PE=1 SV=1 - [ARMX5_HUMAN]	1.08	1	1	0	62.3066
H7C4J4	Armadillo repeat-containing protein 8 (Fragment) OS=Homo sapiens GN=ARMC8 PE=1 SV=1 - [H7C4J4_HUMAN]	6.67	2	2	0	9.93222
Q15027	Arf-GAP with coiled-coil, ANK repeat and PH domain-containing protein 1 OS=Homo sapiens GN=ACAP1 PE=1 SV=1 - [ACAP1_HUMAN]	0.81	1	2	0	81.4848
C9JLV4	Apoptotic protease-activating factor 1 OS=Homo sapiens GN=APAF1 PE=1 SV=1 - [C9JLV4_HUMAN]	0.43	1	1	0	132.379
P04114	Apolipoprotein B-100 OS=Homo sapiens GN=APOB PE=1 SV=2 - [APOB_HUMAN]	0.28	2	3	0	515.283
Q7Z7Q0	APOB protein OS=Homo sapiens GN=APOB PE=2 SV=1 - [Q7Z7Q0_HUMAN]	0.85	1	2	0	92.2752
Q53XS6	Antigen p97 (Melanoma associated) identified by monoclonal antibodies 133.2 and 96.5 OS=Homo sapiens GN=MFI2 PE=2 SV=1 - [Q53XS6_HUMAN]	2.65	1	2	0	32.7018
Q5GIA7	Antigen MU-RMS-40.16A (Fragment) OS=Homo sapiens PE=2 SV=1 - [Q5GIA7_HUMAN]	0.59	1	1	0	118.126
E5RFF0	Annexin A6 (Fragment) OS=Homo sapiens GN=ANXA6 PE=1 SV=1 - [E5RFF0_HUMAN]	3.21	1	2	0	17.5359
P12429	Annexin A3 OS=Homo sapiens GN=ANXA3 PE=1 SV=3 - [ANXA3_HUMAN]	1.55	1	2	0	36.3527
P07355	Annexin A2 OS=Homo sapiens GN=ANXA2 PE=1 SV=2 - [ANXA2_HUMAN]	1.47	1	2	0	38.5798
P50995	Annexin A11 OS=Homo sapiens GN=ANXA11 PE=1 SV=1 - [ANX11_HUMAN]	0.99	1	2	0	54.3551
P04083	Annexin A1 OS=Homo sapiens GN=ANXA1 PE=1 SV=2 - [ANXA1_HUMAN]	1.45	1	2	0	38.69
A6NC57	Ankyrin repeat domain-containing protein 62 OS=Homo sapiens GN=ANKRD62 PE=2 SV=4 - [ANR62_HUMAN]	0.55	1	6	0	106.379
Q9UPS8	Ankyrin repeat domain-containing protein 26 OS=Homo sapiens GN=ANKRD26 PE=1 SV=3 - [ANR26_HUMAN]	0.53	1	2	0	196.202
J3KQ21	Ankyrin repeat and MYND domain-containing protein 1 OS=Homo sapiens GN=ANKMY1 PE=1 SV=1 - [J3KQ21_HUMAN]	0.49	1	6	0	114.969
Q8IWG5	ANKHD1 protein OS=Homo sapiens GN=ANKHD1 PE=2 SV=1 - [Q8IWG5_HUMAN]	0.81	1	1	0	91.4117
Q9Y2J4	Angiomotin-like protein 2 OS=Homo sapiens GN=AMOTL2 PE=1 SV=3 - [AMOL2_HUMAN]	0.77	1	1	0	85.7126
A6NP16	Angiomotin OS=Homo sapiens GN=AMOT PE=1 SV=1 - [A6NP16_HUMAN]	1.51	1	4	0	68.3504
Q13685	Angio-associated migratory cell protein OS=Homo sapiens GN=AAMP PE=1 SV=2 - [AAMP_HUMAN]	5.07	3	3	0	46.7214
Q8N7X0	Androglobin OS=Homo sapiens GN=ADGB PE=2 SV=3 - [ADGB_HUMAN]	0.36	1	2	0	189.594
A2BDD9	AMOT protein OS=Homo sapiens GN=AMOT PE=2 SV=1 - [A2BDD9_HUMAN]	1.33	1	4	0	72.5923
A1KXQ2	AML-associated zinc finger protein OS=Homo sapiens GN=AZFP PE=2 SV=1 - [A1KXQ2_HUMAN]	5.88	1	3	0	11.4907
B0BCZ3	Aminopeptidase OS=Homo sapiens GN=ENPEP PE=2 SV=1 - [B0BCZ3_HUMAN]	0.73	1	1	0	109.206
L8E785	Alternative protein ZNF389 OS=Homo sapiens GN=ZNF389 PE=4 SV=1 - [L8E785_HUMAN]	11.9	1	1	0	4.57847
L8E9H7	Alternative protein TWISTNB OS=Homo sapiens GN=TWISTNB PE=4 SV=1 - [L8E9H7_HUMAN]	6.58	1	1	0	9.24428
P22083	Alpha-(1,3)-fucosyltransferase 4 OS=Homo sapiens GN=FUT4 PE=2 SV=3 - [FUT4_HUMAN]	0.94	1	1	0	59.047
A4LAA3	Alpha thalassemia/mental retardation syndrome X-linked OS=Homo sapiens GN=ATRX PE=4 SV=1 - [A4LAA3_HUMAN]	0.24	1	2	0	282.412
Q5IBP5	AKAP9-BRAF fusion protein OS=Homo sapiens PE=2 SV=1 - [Q5IBP5_HUMAN]	0.4	1	1	0	172.057
O75366	Advillin OS=Homo sapiens GN=AVIL PE=1 SV=3 - [AVIL_HUMAN]	0.98	1	1	0	91.9694
F1ABM9	Advanced glycosylation end product-specific receptor, splice variant 2 OS=Homo sapiens GN=AGER PE=2 SV=1 - [F1ABM9_HUMAN]	3.87	1	1	0	16.4192
O95996	Adenomatous polyposis coli protein 2 OS=Homo sapiens GN=APC2 PE=1 SV=1 - [APCL_HUMAN]	0.26	1	1	0	243.799
A4D1E4	A kinase (PRKA) anchor protein (Yotiao) 9 OS=Homo sapiens GN=AKAP9 PE=4 SV=1 - [A4D1E4_HUMAN]	0.36	1	1	0	192.725
Q9UNA0	A disintegrin and metalloproteinase with thrombospondin motifs 5 OS=Homo sapiens GN=ADAMTS5 PE=1 SV=2 - [ATS5_HUMAN]	0.86	1	2	0	101.653
P32969	60S ribosomal protein L9 OS=Homo sapiens GN=RPL9 PE=1 SV=1 - [RL9_HUMAN]	6.25	2	2	0	21.8498
Q92901	60S ribosomal protein L3-like OS=Homo sapiens GN=RPL3L PE=2 SV=3 - [RL3L_HUMAN]	2.95	2	4	0	46.2669
C9JNW5	60S ribosomal protein L24 OS=Homo sapiens GN=RPL24 PE=1 SV=1 - [C9JNW5_HUMAN]	4.67	1	1	0	17.5315
Q07020	60S ribosomal protein L18 OS=Homo sapiens GN=RPL18 PE=1 SV=2 - [RL18_HUMAN]	3.19	1	1	0	21.6211
P56378	6.8 kDa mitochondrial proteolipid OS=Homo sapiens GN=MP68 PE=1 SV=1 - [68MP_HUMAN]	12.07	1	2	0	6.65759
A0A090N7U2	5'-nucleotidase OS=Homo sapiens GN=NT5C3 PE=3 SV=1 - [A0A090N7U2_HUMAN]	3.51	1	2	0	32.5378
K7EJ78	40S ribosomal protein S15 OS=Homo sapiens GN=RPS15 PE=1 SV=2 - [K7EJ78_HUMAN]	5.43	1	2	0	14.7499
Q9BYD2	39S ribosomal protein L9, mitochondrial OS=Homo sapiens GN=MRPL9 PE=1 SV=2 - [RM09_HUMAN]	2.62	1	1	0	30.2244
Q9HD33	39S ribosomal protein L47, mitochondrial OS=Homo sapiens GN=MRPL47 PE=1 SV=2 - [RM47_HUMAN]	2	1	3	0	29.4319
Q05823	2-5A-dependent ribonuclease OS=Homo sapiens GN=RNASEL PE=1 SV=2 - [RN5A_HUMAN]	0.94	1	3	0	83.4805
Q9P212	1-phosphatidylinositol 4,5-bisphosphate phosphodiesterase epsilon-1 OS=Homo sapiens GN=PLCE1 PE=1 SV=3 - [PLCE1_HUMAN]	0.26	1	2	0	258.551
P61604	10 kDa heat shock protein, mitochondrial OS=Homo sapiens GN=HSPE1 PE=1 SV=2 - [CH10_HUMAN]	6.86	1	2	0	10.9249
